# Supplementary material for: Revealing the effect of structure curations on the simulated CO2 separation performances of MOFs
Source: Royal Society of Chemistry journal article supplement (doi:10.1039/d0ma00039f), 2020-01-01
Supplement: d0ma00039f1.xlsx [file d0ma00039f1.xlsx]

## Sheet: Table 1
		With bound solvent (CO2 uptake, mol/kg)			Without bound solvent (CO2 uptake, mol/kg)			Ratio=Without/With			Optimized bound solvent (CO2 uptake, mol/kg)
MOF	Solvent	@0.1 bar	@1 bar	@10 bar	@0.1 bar	@1 bar	@10 bar	@0.1 bar	@1 bar	@10 bar	@0.1 bar	@1 bar	@10 bar	With (PLD, Å)	Without (PLD, Å)	Optimized (PLD, Å)	With (LCD, Å)	Without (LCD, Å)	Optimized (LCD, Å)	Comments on thermal stability if available
ACUFEK	H2O	0.166382	1.70317	18.1136	0.260743	2.62428	21.8788	1.56714	1.54082	1.20787	0.17935	1.86147	19.6158	7.6142	9.00897	8.66895	13.1683	15.5563	15.0085	"Prior to gas sorption experiments, guest solvent molecules are removed by solvent exchange and thermal activation at an optimized temperature of 150°C."
ECOLEP	H2O	0.0462922	0.472729	5.89547	0.0872609	0.905773	15.1507	1.885	1.91605	2.56988	0.092238	0.968129	17.5208	9.86806	10.9179	10.7228	10.1514	11.6397	11.4084	"TGA shows a gradual weight loss of about 57.32% below 275°C corresponding to the loss of all guest methanol and DMA. And then the compound begins to decompose, with loss of coordination water molecules."
EXOTOB	H2O	0.105358	1.17574	10.386	0.293249	3.4853	16.3024	2.78336	2.96435	1.56964	0.18923	2.27861	14.4424	6.21681	7.77482	6.85621	13.2821	13.2811	12.7541	"TG traces of activated samples keeps steady till the decomposition temperature. The stability of frameworks was also indicated by thermodiffractometry as there was no significant exothermic peak before 250°C."
LEJRIC	H2O	0.0526501	0.560831	5.4203	1.33254	6.57351	10.7296	25.3094	11.721	1.97952	6.47243	7.40898	9.11273	8.41595	10.847	9.64072	9.94365	11.6004	10.4486	"The amount of weight loss in the TG and the thermodiffraction experiment indicate that the framework of the Ni-coordination polymer is stable in an inert atmosphere even after complete dehydration which includes the removal of the water molecules coordinating the metal."
NEVPUA	H2O	0.338018	1.51999	2.54461	0.58047	2.57163	3.86015	1.71728	1.69188	1.51699	0.453717	1.9017	2.9508	5.2051	5.20513	5.1275	6.3588	6.3588	6.36774	Not reported. No TGA diagram.
NEVQAH	H2O	0.331505	1.40101	2.29709	0.555748	2.37898	3.49827	1.67644	1.69805	1.52291	0.455649	1.82955	2.7494	5.1717	5.1717	5.12306	6.31298	6.31298	6.33122	Not reported. No TGA diagram.
NIKDAM	H2O	1.98879	4.38083	8.78226	3.93795	7.63155	10.875	1.98007	1.74203	1.2383	1.02468	3.38081	5.35814	7.14347	7.14344	5.60418	7.96983	7.96988	6.09254	"Crystals of sample-1 were more stable, and the X-ray data were collected at room temperature, without a capillary."
OCIYUW	H2O	0.35926	2.35971	3.54937	3.39575	4.71793	5.69255	9.45208	1.99937	1.60382	2.02689	3.05491	3.12093	6.58466	6.58286	4.4709	9.32304	8.80231	7.35846	"Immediately after dehydration, an exothermic effect appears at 177°C, which probably indicates a structural change invoked by the loss of the water molecules embedded in the structure. At 297°C, an intense and well-defined endothermic effect appears, which is followed by the pyrolysis of the compound. This endothermic effect could be due to a melting process. Decomposition takes place in two ste…
OFAWAV	H2O	0.0670505	0.694895	9.14722	0.114881	1.21141	12.3437	1.71334	1.74329	1.34945	0.0929965	0.975424	10.6572	7.93976	8.90439	9.02041	9.70664	11.4292	10.6752	"Smooth mass loss in the temperature region between 30 and 400°C can be assigned to the loss 6-8 water molecules, coordinated to the cluster. Further heating leads to the framework decomposition, accompanied by mass loss of 42%."
OQIQUB	H2O	0.933556	2.96249	3.93938	1.17094	3.5778	4.90466	1.25428	1.2077	1.24503	0.514675	2.09933	3.15728	4.88882	4.90173	4.49993	6.32359	7.62027	7.30486	"The coordinated water molecules in sample-1 are easy leaving groups and can be readily replaced by the substrates, thus it is easier for the substrates to enter the Cu2+, further enhancing the catalytic activity."
OQIQUB01	H2O	0.727478	2.9435	4.24865	1.10961	3.53094	4.8009	1.52528	1.19957	1.12998	0.414806	1.72268	3.09844	4.59837	4.59669	3.76527	6.21314	7.44171	7.05915	Not reported. No TGA diagram. But OQUQUB01 is the version of OQUQUB whose ions were replaced twice in order to return its original form.
PACZUQ	H2O	0.100265	0.941944	3.37708	5.78056	7.09728	7.76339	57.6529	7.53471	2.29885	2.69605	2.79495	3.02317	4.23947	4.23947	3.21254	6.93068	6.93068	5.01982	"The first weight loss of 5.35% between 61 and 154°C corresponds to there-lease of four lattice water molecules. In the second stage it experiences a 16.33% weight loss in the temperature range of 157-346°C, which is attributed to the release of six lattice water molecules and six coordinated water molecules. The last weight loss of 20.23% was observed in the temperature range of 355-686°C, which…
POZHUI	H2O	0.390787	0.988378	3.10468	0.290008	1.49806	5.85026	0.742114	1.51568	1.88434	0.420346	1.8478	7.20696	3.7857	5.6418	6.25619	9.39252	11.1599	17.1565	"Since water molecules coordinated to extra-framework cations in ion-exchanged zeolite-like MOFs, it requires temperatures well above 300°C for removal."
RUWXAJ	H2O	1.70761	3.05392	3.67945	3.8851	4.95385	5.76289	2.27516	1.62213	1.56624	1.54338	3.09239	3.45686	4.0299	4.0299	3.11603	5.17293	5.27417	3.75817	"TGA reveals a weight loss of 20.3% in the temperature range of 80-300°C, corresponding to two coordinated H2O and four H2O molecules residing in the open channels, and no decomposition takes place up to 400°C. Structure was heated at 110°C under a vacuum for 2 h, but the crystal became opaque although the framework remains intact as confirmed by the power X-ray diffraction analysis."
WEMBUN	protonated H2O	1.26975	3.21597	4.17477	1.5203	3.35332	5.59694	1.19732	1.04271	1.34066	0.663021	2.76972	4.57599	4.21093	4.30379	3.56684	4.73528	4.83761	4.2544	No TGA diagram. "The channels are occupied by uncoordinated water and ethanol molecules and the coordinated water molecules and lattice water molecules are connected by hydrogen bonds, which can stabilize coordination polymers."
WEMCAU	protonated H2O	2.3297	3.74388	4.56202	1.50297	3.79118	5.66726	0.645132	1.01263	1.24227	1.10093	3.33842	4.76243	4.27369	4.293	3.54408	4.57083	4.83981	4.2928	No TGA diagram. "The channels are occupied by uncoordinated water and ethanol molecules and the coordinated water molecules and lattice water molecules are connected by hydrogen bonds, which can stabilize coordination polymers."
WEMDOJ	protonatedH2O	1.11502	3.34859	4.57195	1.78894	3.65781	6.18832	1.6044	1.09234	1.35354	1.03686	4.65838	5.9417	4.31953	4.39275	4.05933	4.66108	4.95352	4.69366	No TGA diagram. "The channels are occupied by uncoordinated water and ethanol molecules and the coordinated water molecules and lattice water molecules are connected by hydrogen bonds, which can stabilize coordination polymers."
WEMDUP	protonated H2O	2.00391	3.90057	5.0489	2.28282	5.80525	7.8513	1.13918	1.48831	1.55505	3.33355	4.58642	5.46035	4.33659	4.37132	3.74478	4.58595	4.9238	4.79277	No TGA diagram. "The channels are occupied by uncoordinated water and ethanol molecules and the coordinated water molecules and lattice water molecules are connected by hydrogen bonds, which can stabilize coordination polymers."
WEMFAX	protonated H2O	1.01282	3.13315	4.35473	1.38428	3.21294	5.7767	1.36676	1.02547	1.32654	0.414466	2.34745	3.7936	4.21554	4.37647	3.74834	4.74315	4.90097	4.79295	No TGA diagram. "The channels are occupied by uncoordinated water and ethanol molecules and the coordinated water molecules and lattice water molecules are connected by hydrogen bonds, which can stabilize coordination polymers."
WEMFEB	protonated H2O	2.15533	3.86467	4.94934	2.64043	6.24025	7.76318	1.22507	1.61469	1.56853	4.11751	4.78583	5.60476	4.21593	4.37038	3.67985	4.74642	4.87971	4.74582	No TGA diagram. "The channels are occupied by uncoordinated water and ethanol molecules and the coordinated water molecules and lattice water molecules are connected by hydrogen bonds, which can stabilize coordination polymers."
WEMFIF	protonated H2O	1.22462	3.26245	4.27598	1.66041	3.45411	5.73264	1.35586	1.05875	1.34066	0.714109	3.0923	4.83398	4.21645	4.34946	3.63312	4.73949	4.85948	4.25389	No TGA diagram. "The channels are occupied by uncoordinated water and ethanol molecules and the coordinated water molecules and lattice water molecules are connected by hydrogen bonds, which can stabilize coordination polymers."
WENKEH	H2O	1.23294	2.23508	3.1842	2.21637	3.30374	3.87513	1.79762	1.47813	1.21699	0.857129	1.64591	2.16226	5.7859	5.7859	4.95331	7.34891	7.53337	5.65897	"Sample-1 loses weight gradually without step from RT to about 400°C, which corresponds to the release of five lattice water molecules and three coordinated water molecules. Above 400°C, the mass sharply lost, which is attributed to the thermal decomposition of the organic components, and the framework starts to decompose."
WENKOR	H2O	0.970647	2.01893	3.03236	1.36877	2.68831	3.52384	1.41016	1.33155	1.16208	0.156619	1.11933	2.17918	5.77431	5.77431	5.61642	7.34523	7.45267	6.86927	"The TGA curve exhibits two main steps of weight loss between RT and about 400°C. The first step corresponds to the removal of four solvent water molecules. The second mass loss occurs in the temperature range from 230 to 400°C, corresponding to loss of the coordinated water molecules. Structural collapse of the framework occurs at about 400 °C."
WIKXUJ	H2O	1.21833	2.42003	3.2656	1.31637	3.00592	4.41358	1.08047	1.2421	1.35154	1.94688	3.04305	3.80589	4.87855	4.88331	5.29433	5.88353	5.90123	6.38705	"The high crystallinity of these compounds was principally ascribed to h-bonding interactions, which decrease the conformational disorder of the flexible side chains and favor the ordering of the water molecules."
KIYMIQ	C3H7NO	0.214228	0.763618	1.09974	0.212932	0.767944	1.09838	0.993951	1.00566	0.998763	1.09564	3.81558	4.69481	5.36447	5.47434	4.9269	6.95	7.09037	6.77765	"The first weight loss of 18.9% observed at 30-260°C may be due to the release of a DMF molecule; and then, the sodium based framework appears stable up to 460°C; the final weight loss of 58.9% at 800°C corresponds to the loss of a ligand."
LENKIA	C3H7NO	0.046183	0.246598	0.514714	0.0459335	0.246055	0.515369	0.994597	0.997795	1.00127	0.448212	3.68332	6.45764	3.46694	4.41	3.969	10.73	11.4939	9.86173	"The first weigth loss is centered at around 85°C which is attributed to the methanol solvent used for the storage of the sample. The other one takes place in the range of 350-490°C with two DTG maximum peaks centered at 370 and 475°C. These weight losses are due to the decomposition of the organic linker and this is clear evidence of the thermal stability of the Cu-based MOF framework."
XIGFOJ	C3H7NO	0.130461	1.22693	8.66789	0.13072	1.22689	8.6754	1.00198	0.999964	1.00087	0.114966	1.02073	6.76785	16.5852	17.0108	15.5798	18.7295	18.91	18.3427	"The TG analysis curve shows that the weight loss of 17.75% during the first step between 20 and 70°C corresponds to the loss of eighteen guest H2O, and the weight loss of 24.16% during the second step between 70 and 200°C corresponds to the loss of five guest DMF and one coordination DMF. Decomposition began above 380°C."

## Sheet: Table 2
	With bound solvent (CO2 uptake, mol/kg) Mixture (CO2/CH4)			With bound solvent (CH4 uptake, mol/kg) Mixture (CO2/CH4)			Without bound solvent (CO2 uptake, mol/kg) Mixture (CO2/CH4)			Without bound solvent (CH4 uptake, mol/kg) Mixture (CO2/CH4)			Optimized (CO2 uptake, mol/kg) Mixture (CO2/CH4)			Optimized (CH4 uptake, mol/kg) Mixture (CO2/CH4)			With bound solvent (CO2/CH4 Selectivities)			Without bound solvent (CO2/CH4 Selectivities)			Optimized (CO2/CH4 Selectivities)			Working Capacity (CO2, mol/kg) @ VSA		Working Capacity (CO2, mol/kg) @ PSA		APS (CO2, mol/kg) @ VSA		APS (CO2, mol/kg) @ PSA		Regenerability (CO2, %) @ VSA		Regenerability (CO2, %) @ PSA
MOF	@0.1 bar	@1 bar	@10 bar	@0.1 bar	@1 bar	@10 bar	@0.1 bar	@1 bar	@10 bar	@0.1 bar	@1 bar	@10 bar	@0.1 bar	@1 bar	@10 bar	@0.1 bar	@1 bar	@10 bar	@0.1 bar	@1 bar	@10 bar	@0.1 bar	@1 bar	@10 bar	@0.1 bar	@1 bar	@10 bar	With	Without	With	Without	With	Without	With	Without	With	Without	With	Without
ACUFEK	0.0840196	0.833069	9.25511	0.0400867	0.386044	2.82043	0.134325	1.30984	12.4138	0.0473752	0.460736	3.22922	0.0901032	0.906358	9.86413	0.0430335	0.420316	3.24749	2.09595	2.15797	3.28146	2.83535	2.84293	3.84422	2.09379	2.15637	3.03746	0.749049	1.17551	8.42204	11.104	1.61642	3.3419	27.6366	42.6862	89.9144	89.7449	90.9988	89.4486
ECOLEP	0.0232234	0.234498	2.53793	0.0139716	0.14147	1.42131	0.0444781	0.449433	5.49906	0.017198	0.174938	1.93796	0.0469894	0.47973	6.05495	0.0175435	0.178157	2.0033	1.66218	1.65758	1.78562	2.58624	2.5691	2.83755	2.67846	2.69274	3.02248	0.211275	0.404955	2.30343	5.04962	0.350204	1.04037	4.11304	14.3286	90.0965	90.1035	90.7602	91.8271
EXOTOB	0.0535178	0.544265	5.58909	0.0234648	0.229171	1.55332	0.149764	1.62749	11.5137	0.029096	0.305812	1.66638	0.0956148	1.01452	10.0808	0.028314	0.283779	1.59953	2.28077	2.37492	3.59815	5.14726	5.32185	6.9094	3.37695	3.57504	6.30237	0.490747	1.47772	5.04482	9.88616	1.16549	7.86421	18.152	68.3074	90.167	90.7978	90.262	85.8647
LEJRIC	0.0263748	0.273669	2.94083	0.0102912	0.103032	0.764225	0.668355	4.932	9.26163	0.0272267	0.211681	0.560062	6.35107	6.95387	8.48907	0.0103273	0.0606107	0.172835	2.56285	2.65617	3.84812	24.5478	23.2992	16.5368	614.978	114.73	49.1167	0.247295	4.26365	2.66716	4.32963	0.656855	99.3395	10.2635	71.5981	90.3625	86.4486	90.6941	46.748
NEVPUA	0.178829	1.01447	2.08044	0.0318198	0.152696	0.233893	0.306655	1.81723	3.29386	0.0450929	0.20419	0.256893	0.238951	1.22667	2.20206	0.0697193	0.332839	0.535463	5.62005	6.6437	8.89486	6.80052	8.89972	12.8219	3.42733	3.68547	4.11244	0.835638	1.51058	1.06598	1.47663	5.55173	13.4437	9.48171	18.9332	82.3722	83.1251	51.2379	44.8297
NEVQAH	0.176004	0.94234	1.86723	0.0315028	0.144433	0.225256	0.294271	1.69466	2.97948	0.0446511	0.192153	0.238197	0.239644	1.18901	2.05217	0.0703302	0.326969	0.513092	5.58693	6.5244	8.28935	6.59046	8.8193	12.5085	3.40741	3.63646	3.99961	0.766337	1.40039	0.924889	1.28483	4.99989	12.3504	7.66673	16.0712	81.3227	82.6354	49.5327	43.1224
NIKDAM	1.74383	3.27065	7.28987	0.0165474	0.163347	0.673648	3.26772	6.16866	9.75849	0.031964	0.205804	0.447593	0.587747	2.42998	4.45472	0.0538219	0.275682	0.515285	105.384	20.0227	10.8215	102.231	29.9734	21.8022	10.9202	8.81445	8.64516	1.52682	2.90094	4.01923	3.58983	30.5711	86.9513	43.494	78.2661	46.6824	47.0271	55.1344	36.7868
OCIYUW	0.174189	1.62669	3.21652	0.011545	0.0728959	0.0846223	3.03175	4.31508	5.39103	0.0156733	0.0422404	0.0480987	1.30325	2.94578	3.10441	0.00929043	0.00607403	0.00635856	15.0878	22.3152	38.0104	193.434	102.155	112.083	140.278	484.98	488.225	1.4525	1.28332	1.58984	1.07595	32.4129	131.098	60.4302	120.596	89.2918	29.7405	49.4271	19.9582
OFAWAV	0.033632	0.343037	4.24662	0.0172279	0.170708	1.51797	0.0585694	0.57824	6.98651	0.0186595	0.185365	1.61778	0.0469908	0.473512	5.67929	0.0193791	0.192265	1.64476	1.95218	2.00949	2.79756	3.13885	3.11947	4.31859	2.42482	2.4628	3.45296	0.309405	0.519671	3.90359	6.40827	0.621747	1.6211	10.9205	27.6747	90.1958	89.8711	91.9221	91.7235
OQIQUB	0.505274	2.22535	3.29811	0.0743963	0.312256	0.407745	0.646386	2.62916	3.99745	0.118539	0.440227	0.527254	0.278866	1.40245	2.4512	0.0717453	0.336408	0.579953	6.79165	7.1267	8.08866	5.45296	5.97228	7.58164	3.88689	4.1689	4.22655	1.72008	1.98278	1.07276	1.36829	12.2585	11.8417	8.67721	10.3739	77.2946	75.4148	32.5265	34.229
OQIQUB01	0.385084	2.02289	3.49839	0.0718373	0.334796	0.464153	0.58345	2.58478	3.90761	0.124802	0.450728	0.55778	0.226674	1.12556	2.35377	0.0542251	0.244467	0.427209	5.3605	6.04215	7.53715	4.67502	5.73469	7.00565	4.18023	4.60413	5.50966	1.6378	2.00133	1.4755	1.32283	9.89585	11.477	11.1211	9.26728	80.9636	77.4275	42.1766	33.8526
PACZUQ	0.0522309	0.491831	2.34372	0.0131212	0.109239	0.29778	5.55445	6.61127	7.45816	0.0250183	0.116091	0.160039	2.685	2.74028	2.8101	0.0141031	0.101895	0.252325	3.98065	4.50232	7.87062	222.015	56.9492	46.6021	190.384	26.8933	11.1369	0.4396	1.05682	1.85188	0.846881	1.97922	60.1851	14.5755	39.4664	89.3803	15.9851	79.0149	11.3551
POZHUI	0.335047	0.660342	2.09935	0.0208258	0.141004	0.580746	0.163773	0.863003	3.92821	0.0317664	0.145169	0.512716	0.265777	1.07048	4.90767	0.0392675	0.172175	0.66332	16.0881	4.68314	3.61492	5.15553	5.94484	7.66157	6.76837	6.21736	7.39864	0.325295	0.699231	1.43901	3.0652	1.5234	4.15681	5.20189	23.4843	49.2616	81.0229	68.5454	78.0306
RUWXAJ	1.10773	2.63989	3.29253	0.0935641	0.189257	0.210518	3.46023	4.6057	5.49478	0.0288481	0.0398066	0.0310723	0.959938	2.79175	3.36564	0.00564166	0.0218743	0.0284846	11.8392	13.9487	15.6401	119.946	115.702	176.838	170.152	127.627	118.156	1.53216	1.14548	0.652643	0.889073	21.3717	132.534	10.2074	157.222	58.0389	24.8708	19.8219	16.1803
WEMBUN	0.758701	2.67061	3.81123	0.0189172	0.0857392	0.14883	1.25611	2.51522	4.7279	0.0196281	0.17163	0.45563	0.353145	2.0212	4.04801	0.0303812	0.14364	0.140027	40.1064	31.1481	25.6079	63.9958	14.6549	10.3766	11.6238	14.0713	28.9088	1.91191	1.25911	1.14062	2.21268	59.5523	18.452	29.2089	22.9601	71.5907	50.0595	29.9278	46.8004
WEMCAU	1.67324	3.40637	4.17502	0.024661	0.0651098	0.0913369	1.11049	2.82614	4.85581	0.0286606	0.228252	0.47311	0.617425	2.56325	4.37623	0.0577789	0.169739	0.136321	67.8496	52.3172	45.7101	38.7464	12.3817	10.2636	10.686	15.1012	32.1024	1.73312	1.71565	0.768658	2.02967	90.6722	21.2426	35.1355	20.8317	50.879	60.7063	18.4109	41.7988
WEMDOJ	0.648981	2.69306	4.12267	0.0184278	0.091439	0.156555	1.63257	2.7395	5.24564	0.0198812	0.166071	0.432901	0.534162	3.63584	5.49854	0.028935	0.165696	0.219277	35.2174	29.452	26.3337	82.1163	16.4959	12.1174	18.4608	21.9429	25.0758	2.04408	1.10693	1.42961	2.50614	60.2022	18.2599	37.6469	30.3678	75.9017	40.4063	34.6768	47.7756
WEMDUP	1.29414	3.44637	4.55819	0.0172894	0.0559469	0.0791152	1.93783	4.51874	7.36023	0.0201982	0.115905	0.122942	2.87075	4.25982	5.23889	0.00778322	0.00752641	0.0139777	74.8519	61.6009	57.6146	95.9405	38.9866	59.8675	368.839	565.983	374.803	2.15223	2.58091	1.11182	2.84148	132.579	100.621	64.0568	170.112	62.4491	57.1158	24.3916	38.6059
WEMFAX	0.592372	2.48441	3.8822	0.0187656	0.0974911	0.177374	1.04783	2.3824	4.7803	0.0181623	0.171159	0.511901	0.210163	1.56017	3.16267	0.0267547	0.16788	0.217911	31.5669	25.4834	21.8871	57.6926	13.9192	9.33834	7.85517	9.2934	14.5136	1.89204	1.33456	1.39779	2.39791	48.2156	18.576	30.5937	22.3925	76.1564	56.0177	36.0052	50.1623
WEMFEB	1.47299	3.4656	4.49289	0.0154914	0.0457627	0.061956	2.02389	5.11948	7.34857	0.0202483	0.0938479	0.0919281	3.78765	4.61068	5.3626	0.00184286	0.00254609	0.00610514	95.0844	75.7298	72.5174	99.9535	54.5508	79.9382	2055.31	1810.89	878.374	1.99261	3.0956	1.02729	2.22908	150.9	168.867	74.4964	178.189	57.4968	60.467	22.8648	30.3336
WEMFIF	0.742367	2.68216	3.88927	0.0187495	0.0863618	0.148245	1.45725	2.59546	4.85905	0.0200765	0.170742	0.446201	0.377958	2.21007	4.35801	0.0304851	0.136891	0.13812	39.5939	31.0572	26.2355	72.5849	15.201	10.8898	12.3981	16.1448	31.5523	1.93979	1.13821	1.20712	2.26359	60.2446	17.3019	31.6694	24.6501	72.322	43.8537	31.0371	46.585
WENKEH	1.16581	1.74152	2.77714	0.0182128	0.128197	0.223634	2.05331	2.96169	3.64142	0.0181542	0.0781125	0.112587	0.714482	1.2941	1.90381	0.0293068	0.122823	0.159279	64.0103	13.5847	12.4182	113.104	37.9157	32.3433	24.3794	10.5363	11.9527	0.575716	0.908381	1.03561	0.67973	7.82096	34.4419	12.8605	21.9847	33.0582	30.671	37.2907	18.6666
WENKOR	0.832305	1.53149	2.61022	0.0170226	0.124096	0.230423	1.11162	2.20891	3.18498	0.0228145	0.109488	0.166138	0.0780038	0.629609	1.67632	0.0273253	0.164845	0.266854	48.8942	12.3412	11.328	48.7241	20.1749	19.1707	2.85464	3.81941	6.28177	0.699189	1.09729	1.07872	0.976076	8.62883	22.1378	12.2198	18.712	45.654	49.6758	41.327	30.6462
WIKXUJ	0.961296	1.99675	2.88073	0.039917	0.11889	0.138642	1.13809	2.45221	3.79382	0.0409579	0.158954	0.200949	1.7054	2.65807	3.43754	0.0315078	0.105594	0.145215	24.0824	16.7949	20.7783	27.7869	15.4272	18.8795	54.1264	25.1726	23.6721	1.03545	1.31412	0.88398	1.34161	17.3903	20.2732	18.3676	25.3289	51.8569	53.5891	30.686	35.363
KIYMIQ	0.109559	0.458169	0.742037	0.0597204	0.215865	0.294335	0.110484	0.456701	0.74059	0.0604445	0.217987	0.294966	0.591395	3.14553	4.4558	0.00860249	0.0545093	0.0840309	1.83453	2.12248	2.52106	1.82786	2.09508	2.51077	68.7469	57.7063	53.0258	0.156145	0.157543	0.0784704	0.0769784	0.327135	9.09121	0.197021	4.08184	72.3344	72.2716	26.6602	26.0974
LENKIA	0.0243748	0.154889	0.343567	0.0079092	0.0576118	0.181188	0.0244999	0.154143	0.3451	0.00778948	0.056563	0.181729	0.214447	2.19912	5.10859	0.068001	0.483766	0.405604	3.08182	2.6885	1.89619	3.14526	2.72515	1.89898	3.15358	4.54583	12.595	0.0497026	0.0487735	0.123577	0.125166	0.135447	0.221716	0.23467	1.57647	86.2716	86.2287	68.2034	68.8751
XIGFOJ	0.0662209	0.610348	4.39388	0.0323478	0.295044	1.77728	0.0661501	0.609951	4.40281	0.0323332	0.294236	1.77456	0.0589208	0.518596	3.3819	0.0283133	0.255142	1.55625	2.04715	2.06867	2.47224	2.04589	2.073	2.48107	2.08103	2.03258	2.17311	0.262696	0.261903	1.48224	1.48033	0.544569	0.532338	3.67754	3.21692	89.0363	89.0111	83.3992	83.4192
	With bound solvent (CO2 uptake, mol/kg) Mixture (CO2/H2)			With bound solvent (H2 uptake, mol/kg) Mixture (CO2/H2)			Without bound solvent (CO2 uptake, mol/kg) Mixture (CO2/H2)			Without bound solvent (H2 uptake, mol/kg) Mixture (CO2/H2)			Optimized (CO2 uptake, mol/kg) Mixture (CO2/H2)			Optimized (H2 uptake, mol/kg) Mixture (CO2/H2)			With bound solvent (CO2/H2 Selectivities)			Without bound solvent (CO2/H2 Selectivities)			Optimized (CO2/H2 Selectivities)			Working Capacity (CO2, mol/kg) @ VSA		Working Capacity (CO2, mol/kg) @ PSA		APS (CO2, mol/kg) @ VSA		APS (CO2, mol/kg) @ PSA		Regenerability (CO2, %) @ VSA		Regenerability (CO2, %) @ PSA
MOF	@0.1 bar	@1 bar	@10 bar	@0.1 bar	@1 bar	@10 bar	@0.1 bar	@1 bar	@10 bar	@0.1 bar	@1 bar	@10 bar	@0.1 bar	@1 bar	@10 bar	@0.1 bar	@1 bar	@10 bar	@0.1 bar	@1 bar	@10 bar	@0.1 bar	@1 bar	@10 bar	@0.1 bar	@1 bar	@10 bar	With	Without	With	Without	With	Without	With	Without	With	Without	With	Without
ACUFEK	0.0254153	0.245668	2.4832	0.00719134	0.069394	0.638119	0.0416402	0.394152	3.77266	0.0080546	0.0778946	0.68952	0.0275726	0.265029	2.73294	0.00772069	0.0746945	0.68814	20.0269	20.0611	22.0515	29.2952	28.6737	31.0048	20.2371	20.1063	22.5051	0.220252	0.352512	2.23753	3.37851	4.41849	10.1078	49.3409	104.75	89.6546	89.4355	90.1068	89.5524
ECOLEP	0.00691151	0.0697694	0.675715	0.00679837	0.0672162	0.63914	0.0132589	0.13383	1.30286	0.00935925	0.0936971	0.887703	0.0140361	0.14269	1.39869	0.008889	0.0893677	0.842527	5.76097	5.88192	5.99095	8.02778	8.09382	8.31684	8.94791	9.04777	9.40732	0.0628579	0.120571	0.605946	1.16903	0.369725	0.975878	3.63019	9.72265	90.0938	90.0927	89.6747	89.728
EXOTOB	0.0159508	0.160759	1.78633	0.004045	0.0397874	0.345549	0.0455608	0.446322	5.11048	0.00525727	0.0513325	0.395723	0.0289217	0.288814	3.54662	0.00453296	0.0449353	0.365164	22.3455	22.8958	29.2941	49.1088	49.2701	73.181	36.1551	36.4216	55.037	0.144808	0.400761	1.62558	4.66416	3.3155	19.7455	47.6199	341.328	90.0778	89.7919	91.0006	91.2665
LEJRIC	0.00776561	0.0796803	0.844997	0.00210062	0.020586	0.188345	0.20319	1.94288	7.37184	0.0034035	0.029243	0.123896	5.96482	6.56483	7.63757	0.000989882	0.00700186	0.0416754	20.9487	21.9334	25.4231	338.301	376.488	337.168	34146.1	5312.98	1038.49	0.0719147	1.73969	0.765316	5.42896	1.57733	654.972	19.4567	1830.47	90.254	89.5418	90.5703	73.6446
NEVPUA	0.0570513	0.47579	1.73195	0.00125384	0.0102166	0.037892	0.096989	0.82854	2.84878	0.00164204	0.0125743	0.0336477	0.0785668	0.623353	2.11444	0.00167977	0.0128429	0.0416809	257.841	263.899	259.009	334.708	373.387	479.767	265.043	275.041	287.465	0.418739	0.731551	1.25616	2.02024	110.505	273.151	325.357	969.242	88.0091	88.294	72.5286	70.9159
NEVQAH	0.0567497	0.458701	1.57548	0.00115877	0.00920895	0.0340638	0.0949577	0.79589	2.5986	0.00153527	0.0114257	0.0297335	0.0790572	0.619294	2.01321	0.00158779	0.0119861	0.0374403	277.52	282.259	262.089	350.488	394.729	495.245	282.148	292.784	304.704	0.401952	0.700933	1.11678	1.80271	113.454	276.679	292.696	892.781	87.6282	88.069	70.8851	69.3723
NIKDAM	1.50894	2.17747	5.11009	0.00228299	0.0214149	0.133623	2.20839	4.41682	8.34364	0.00277356	0.0210688	0.0879622	0.198249	1.34438	3.81227	0.00212977	0.0165043	0.0597576	3745.37	576.188	216.708	4511.97	1187.95	537.511	527.48	461.587	361.508	0.668526	2.20843	2.93262	3.92682	385.197	2623.49	635.523	2110.71	30.702	50.0004	57.3889	47.0636
OCIYUW	0.0510037	0.560878	2.65397	0.00109127	0.00959721	0.0243532	2.49179	3.6247	4.91626	0.000937484	0.00514027	0.0153367	0.46969	2.38355	3.07315	0.000754009	0.00127762	0.000892546	264.847	331.17	617.543	15061.8	3995.89	1816.49	3529.9	10571.8	19511.1	0.509874	1.1329	2.09309	1.29156	168.855	4526.96	1292.57	2346.1	90.9065	31.2551	78.8664	26.2712
OFAWAV	0.0100598	0.101237	1.05116	0.0036976	0.0372867	0.340544	0.0176068	0.175821	1.83734	0.00433328	0.043035	0.382439	0.0141307	0.141559	1.48269	0.00404322	0.0402145	0.359763	15.4169	15.3856	17.4913	23.0245	23.1514	27.2242	19.8046	19.9473	23.354	0.0911773	0.158214	0.949924	1.66152	1.40281	3.66289	16.6154	45.2334	90.0631	89.986	90.369	90.4307
OQIQUB	0.170052	1.27699	3.14875	0.00202115	0.0142479	0.0457972	0.227135	1.56971	3.82663	0.00259341	0.0179672	0.0537464	0.0961836	0.726562	2.33406	0.00175032	0.0132659	0.0459664	476.772	507.882	389.607	496.295	495.07	403.455	311.394	310.359	287.74	1.10693	1.34258	1.87176	2.25692	562.192	664.67	729.251	910.566	86.6833	85.5302	59.4447	58.9793
OQIQUB01	0.131923	1.00427	3.22927	0.0020522	0.0159138	0.0546236	0.19625	1.52016	3.76437	0.00267671	0.0186383	0.0590884	0.0770954	0.566703	1.96442	0.00155357	0.0122801	0.0555891	364.274	357.605	335.006	415.467	462.177	361.008	281.207	261.506	200.249	0.872344	1.32391	2.22501	2.24421	311.955	611.879	745.389	810.178	86.8638	87.0901	68.9011	59.6172
PACZUQ	0.015652	0.154802	1.28769	0.00117319	0.0112047	0.0730884	5.33909	5.923	7.24573	0.000763677	0.00592117	0.0167217	2.65762	2.71182	2.82408	0.000195738	0.00184042	0.0130076	75.6016	78.2894	99.837	39617.3	5668.42	2455.43	76938.7	8349.71	1230.29	0.13915	0.58391	1.13289	1.32273	10.894	3309.85	113.104	3247.87	89.889	9.85834	87.9783	18.2553
POZHUI	0.259569	0.432492	1.24031	0.00155108	0.0139774	0.106175	0.0590299	0.3957	1.95751	0.00233867	0.0212376	0.157555	0.121519	0.534172	2.44824	0.00253012	0.0234512	0.175478	948.303	175.339	66.197	143.031	105.582	70.404	272.165	129.076	79.0601	0.172923	0.33667	0.80782	1.56181	30.3201	35.5462	53.4752	109.958	39.9829	85.0822	65.1304	79.7855
RUWXAJ	0.467077	2.03901	3.18755	0.00166516	0.00678083	0.0165546	2.83767	4.10162	5.09087	0.000887635	0.00316717	0.0106432	0.351515	1.91399	3.19591	0.00121057	0.00624642	0.0128027	1589.49	1703.98	1091.1	18115.7	7338.58	2710.5	1645.44	1736.35	1414.56	1.57193	1.26395	1.14854	0.989254	2678.53	9275.61	1253.17	2681.37	77.0929	30.8159	36.0321	19.4319
WEMBUN	0.271548	1.61773	3.42907	0.00140319	0.00906407	0.0264395	0.768158	1.69473	3.81476	0.00170528	0.0152124	0.0762422	0.110591	0.939672	3.13956	0.00155862	0.0118247	0.0343624	1096.63	1011.37	734.937	2552.6	631.292	283.53	402.074	450.314	517.741	1.34618	0.926568	1.81134	2.12003	1361.48	584.935	1331.22	601.092	83.2142	54.6736	52.8231	55.5745
WEMCAU	0.726765	2.6751	3.86709	0.001407	0.0058361	0.0152739	0.574482	1.74563	4.21176	0.00194621	0.0160646	0.0642397	0.203762	1.49854	3.69889	0.00186862	0.0110522	0.0258526	2927.02	2597.44	1434.71	1672.69	615.756	371.525	617.916	768.33	810.764	1.94834	1.17115	1.19199	2.46613	5060.68	721.142	1710.15	916.228	72.8323	67.0903	30.8239	58.5534
WEMDOJ	0.221879	1.4826	3.59955	0.00153332	0.0106332	0.0332169	1.45936	1.91864	4.16126	0.00173268	0.0160031	0.0824837	0.165163	1.54252	4.99779	0.00180949	0.0141704	0.0289722	819.993	790.111	614.068	4772.79	679.39	285.881	517.23	616.844	977.515	1.26072	0.459281	2.11695	2.24262	996.107	312.03	1299.95	641.122	85.0344	23.9378	58.8116	53.8928
WEMDUP	0.507594	2.4194	4.07956	0.00144642	0.0074198	0.020089	1.63985	2.68525	6.37697	0.00171217	0.0136862	0.0357395	1.7778	3.56441	4.74974	0.000871225	0.00257429	0.00870971	1988.61	1847.75	1150.76	5427.3	1111.81	1011.1	11563.3	7846.17	3090.25	1.91181	1.0454	1.66016	3.69172	3532.54	1162.29	1910.44	3732.7	79.0198	38.9312	40.6946	57.8915
WEMFAX	0.199811	1.33935	3.395	0.0014797	0.0106615	0.0340385	0.541266	1.57757	3.69752	0.00184295	0.0161519	0.089866	0.0645685	0.608208	2.64544	0.00146269	0.0127569	0.0424601	765.194	711.878	565.193	1664.28	553.467	233.154	250.148	270.169	353.057	1.13954	1.0363	2.05564	2.11996	811.216	573.558	1161.84	494.277	85.0816	65.6898	60.5492	57.3345
WEMFEB	0.606491	2.54902	4.03493	0.00132401	0.00625906	0.0169347	1.64151	3.00598	6.67102	0.00166353	0.0123612	0.0272901	3.02264	4.28474	4.94706	0.000390382	0.00109713	0.00497795	2595.75	2307.76	1350.17	5591.65	1378.01	1385.21	43875.7	22130.5	5631.51	1.94252	1.36447	1.48592	3.66504	4482.88	1880.26	2006.24	5076.84	76.2068	45.3919	36.8263	54.9397
WEMFIF	0.259723	1.60422	3.47383	0.00142361	0.00933485	0.0279473	1.10995	1.80267	3.92436	0.0017553	0.0152646	0.0771117	0.117624	1.01309	3.47277	0.00155038	0.0118057	0.0321643	1033.82	973.83	704.364	3583.27	669.204	288.387	429.918	486.277	611.829	1.34449	0.692718	1.86962	2.12169	1309.31	463.569	1316.89	611.869	83.81	38.4273	53.82	54.0646
WENKEH	1.10622	1.31692	2.44513	0.000903677	0.00818121	0.030889	1.92074	2.39363	3.4309	0.000815533	0.00608656	0.0161217	0.496873	0.965161	1.7591	0.000741046	0.00549059	0.0161894	6936.75	912.154	448.565	13346.1	2228.5	1205.94	3799.52	996.114	615.725	0.210697	0.472894	1.12821	1.03727	192.189	1053.84	506.076	1250.89	15.9993	19.7563	46.1412	30.2332
WENKOR	0.65228	1.06128	2.24162	0.000904009	0.00801621	0.032794	0.762222	1.55746	2.88103	0.00111429	0.00787937	0.0243902	0.0239028	0.229704	1.32353	0.000954356	0.00842094	0.0334214	4088.74	750.222	387.343	3876.24	1120.09	669.362	141.928	154.574	224.408	0.409002	0.795238	1.18034	1.32357	306.842	890.738	457.195	885.949	38.5385	51.0599	52.6555	45.9409
WIKXUJ	0.756348	1.4154	2.56645	0.00122139	0.00844725	0.0283402	0.930595	1.77385	3.1123	0.00126527	0.00973703	0.0362396	1.49348	2.1313	3.184	0.00101024	0.00698113	0.0248476	3509.1	949.493	513.165	4167.77	1032.33	486.66	8377.3	1730	726.132	0.659053	0.843254	1.15105	1.33845	625.767	870.515	590.677	651.371	46.563	47.5381	44.8498	43.0052
KIYMIQ	0.0374117	0.296354	0.833	0.000736596	0.00554596	0.0157192	0.0374795	0.29506	0.835339	0.000749881	0.00547141	0.0157908	0.185211	1.54789	4.03592	0.0014833	0.0106143	0.0218779	50.7899	53.436	52.9925	49.9806	53.9276	52.9004	707.565	826.37	1045.36	0.258942	0.25758	0.536646	0.54028	13.8368	13.8907	28.4382	28.581	87.376	87.2977	64.4233	64.6778
LENKIA	0.0077134	0.0667011	0.291703	0.000301347	0.00265158	0.0156981	0.00767631	0.0678462	0.29411	0.000295075	0.00271022	0.015705	0.064941	0.703867	4.14203	0.00254684	0.0225892	0.0549435	25.5964	25.1552	18.582	26.0148	25.0335	18.7272	144.492	176.57	427.193	0.0589877	0.0601699	0.225002	0.226264	1.48385	1.50626	4.18099	4.23729	88.4359	88.6857	77.1339	76.9317
XIGFOJ	0.0200449	0.194737	1.73331	0.00451681	0.0448462	0.393171	0.0200027	0.195821	1.73266	0.00452512	0.0449125	0.393458	0.0179544	0.172857	1.40763	0.00401314	0.0400126	0.351584	4.43785	4.34233	4.40853	4.42037	4.36005	4.40367	25.3521	24.4804	22.6875	0.174692	0.175818	1.53857	1.53684	0.758572	0.766574	6.78283	6.76772	89.7067	89.7852	88.765	88.6983
	With bound solvent (CO2 uptake, mol/kg) Mixture (CO2/N2)			With bound solvent (N2 uptake, mol/kg) Mixture (CO2/N2)			Without bound solvent (CO2 uptake, mol/kg) Mixture (CO2/N2)			Without bound solvent (N2 uptake, mol/kg) Mixture (CO2/N2)			Optimized (CO2 uptake, mol/kg) Mixture (CO2/N2)			Optimized (N2 uptake, mol/kg) Mixture (CO2/N2)			With bound solvent (CO2/N2 Selectivities)			Without bound solvent (CO2/N2 Selectivities)			Optimized (CO2/N2 Selectivities)			Working Capacity (CO2, mol/kg) @ VSA		Working Capacity (CO2, mol/kg) @ PSA		APS (CO2, mol/kg) @ VSA		APS (CO2, mol/kg) @ PSA		Regenerability (CO2, %) @ VSA		Regenerability (CO2, %) @ PSA
MOF	@0.1 bar	@1 bar	@10 bar	@0.1 bar	@1 bar	@10 bar	@0.1 bar	@1 bar	@10 bar	@0.1 bar	@1 bar	@10 bar	@0.1 bar	@1 bar	@10 bar	@0.1 bar	@1 bar	@10 bar	@0.1 bar	@1 bar	@10 bar	@0.1 bar	@1 bar	@10 bar	@0.1 bar	@1 bar	@10 bar	With	Without	With	Without	With	Without	With	Without	With	Without	With	Without
ACUFEK	0.0252755	0.24498	2.35515	0.0270152	0.259945	2.24683	0.0413114	0.395625	3.55405	0.0326182	0.312471	2.59124	0.0273976	0.26611	2.5851	0.0292331	0.282775	2.45654	5.30175	5.34045	5.93984	7.1769	7.17466	7.7722	5.31088	5.3327	5.96324	0.219705	0.354314	2.11017	3.15842	1.17332	2.54208	12.5341	24.5479	89.6826	89.558	89.5981	88.8683
ECOLEP	0.00692989	0.0700062	0.671202	0.0140401	0.141322	1.32057	0.0131877	0.133425	1.32552	0.0191258	0.192964	1.84453	0.013909	0.142097	1.42735	0.0192037	0.192043	1.83805	2.79695	2.80708	2.88018	3.90731	3.91823	4.07219	4.1043	4.1929	4.40047	0.0630763	0.120237	0.601195	1.19209	0.17706	0.471118	1.73155	4.85443	90.101	90.116	89.57	89.9341
EXOTOB	0.0160398	0.161007	1.65469	0.0156482	0.154681	1.27047	0.0454792	0.4384	4.72476	0.0209268	0.202965	1.64115	0.0288514	0.287364	3.32438	0.0190035	0.186699	1.52593	5.80848	5.89842	7.38042	12.3151	12.2399	16.314	8.60322	8.72203	12.3454	0.144967	0.392921	1.49369	4.28636	0.855078	4.8093	11.024	69.9275	90.0378	89.6261	90.2697	90.7212
LEJRIC	0.00787034	0.0796188	0.797538	0.00729211	0.0724157	0.63178	0.20178	1.91837	7.01544	0.0195734	0.173417	0.633413	5.96148	6.55701	7.58496	0.00936553	0.0384208	0.176845	6.116	6.23033	7.15341	58.4173	62.6856	62.7619	3607.02	967.09	243.046	0.0717485	1.71659	0.717919	5.09708	0.447017	107.605	5.13557	319.902	90.115	89.4817	90.0169	72.6551
NEVPUA	0.0563445	0.448319	1.54197	0.0132422	0.0968683	0.242294	0.0964807	0.79192	2.60528	0.0183784	0.132998	0.271143	0.0769688	0.577233	1.78932	0.0236183	0.16535	0.414361	24.1112	26.2261	36.0629	29.7481	33.7414	54.4482	18.4669	19.7821	24.4702	0.391974	0.695439	1.09365	1.81336	10.2799	23.4651	39.44	98.7342	87.432	87.8169	70.9255	69.6033
NEVQAH	0.0561566	0.430098	1.4021	0.0128647	0.0915827	0.222955	0.0931069	0.759902	2.38074	0.0179081	0.125559	0.244848	0.0780731	0.575009	1.70084	0.023375	0.159812	0.388104	24.736	26.6122	35.636	29.4618	34.2954	55.099	18.9268	20.3889	24.8338	0.373941	0.666795	0.972002	1.62084	9.95141	22.868	34.6382	89.3066	86.9433	87.7475	69.3247	68.0813
NIKDAM	1.51734	2.19612	4.89688	0.0100296	0.095262	0.624876	2.2402	4.39687	8.00643	0.0214382	0.135499	0.509117	0.200765	1.3017	3.51973	0.0216188	0.154066	0.344909	857.289	130.636	44.4072	592.144	183.88	89.1147	52.6241	47.8773	57.8273	0.678779	2.15667	2.70075	3.60956	88.6733	396.569	119.933	321.665	30.9081	49.0501	55.1526	45.0833
OCIYUW	0.0507219	0.545643	2.52859	0.0074668	0.0664532	0.146086	2.46999	3.60926	4.85675	0.00982124	0.0456875	0.0705285	0.477828	2.3863	3.07064	0.00908933	0.0114112	0.00738691	38.4936	46.5287	98.084	1425.13	447.661	390.219	297.898	1185.01	2355.56	0.494921	1.13927	1.98295	1.24749	23.028	510.008	194.495	486.794	90.7042	31.5653	78.421	25.6857
OFAWAV	0.0100577	0.101505	1.02684	0.0127406	0.126388	1.12596	0.0174157	0.174929	1.79299	0.0149436	0.147732	1.31755	0.014043	0.141013	1.44608	0.0144737	0.144012	1.27692	4.47337	4.55101	5.16784	6.60408	6.70987	7.71154	5.49805	5.54864	6.41735	0.0914472	0.157514	0.925337	1.61807	0.416177	1.05689	4.78199	12.4778	90.0914	90.0442	90.1149	90.2437
OQIQUB	0.170564	1.22072	2.85928	0.0259682	0.171165	0.348719	0.223656	1.48955	3.42185	0.0378489	0.242564	0.452119	0.0939962	0.68143	2.03285	0.0227643	0.157807	0.382709	37.2197	40.4137	46.4632	33.4853	34.7982	42.888	23.3983	24.4694	30.0999	1.05016	1.26589	1.63856	1.9323	42.4409	44.0508	76.1326	82.8725	86.0277	84.985	57.3066	56.4695
OQIQUB01	0.130157	0.955143	2.88853	0.0257361	0.177223	0.406832	0.192036	1.43198	3.35975	0.0397429	0.251186	0.464989	0.0760547	0.540353	1.72759	0.0176795	0.121043	0.34068	28.6584	30.5405	40.2335	27.3811	32.3049	40.9442	24.3772	25.2968	28.7357	0.824986	1.23994	1.93338	1.92778	25.1955	40.0561	77.7868	78.9314	86.3731	86.5894	66.9332	57.3786
PACZUQ	0.0154542	0.15152	1.16022	0.00581382	0.0549484	0.283576	5.31791	5.94386	7.15519	0.00811152	0.0615628	0.129307	2.64321	2.7125	2.80151	0.00176071	0.0169727	0.0987332	15.063	15.6258	23.1845	3715.06	547.114	313.564	8506.92	905.623	160.789	0.136065	0.625952	1.0087	1.21133	2.12612	342.467	23.3862	379.831	89.8005	10.5311	86.9404	16.9294
POZHUI	0.257532	0.425293	1.11835	0.0114776	0.0742053	0.441923	0.0573244	0.373831	1.78757	0.0154491	0.109578	0.547016	0.118751	0.516253	2.26264	0.0177885	0.115913	0.666928	127.147	32.4774	14.3404	21.0264	19.3321	18.5179	37.8291	25.2381	19.2249	0.167761	0.316507	0.693061	1.41374	5.44842	6.11874	9.93875	26.1795	39.4459	84.6657	61.9715	79.0872
RUWXAJ	0.462737	1.96063	3.04351	0.0337941	0.121629	0.154761	2.84543	4.06967	5.07867	0.014765	0.0360765	0.0399554	0.352091	1.90956	3.13529	0.00709781	0.0416506	0.0744373	77.5926	91.3449	111.44	1092.05	639.238	720.281	281.098	259.8	238.68	1.49789	1.22424	1.08288	1.009	136.824	782.582	120.676	726.766	76.3985	30.0821	35.5801	19.8675
WEMBUN	0.277158	1.60971	3.29769	0.0120211	0.0763081	0.178046	0.779755	1.68606	3.54757	0.0110819	0.1004	0.478653	0.108891	0.910595	2.95371	0.0146132	0.109615	0.240831	130.65	119.537	104.955	398.725	95.1627	41.9989	42.2255	47.074	69.4997	1.33255	0.906302	1.68798	1.86151	159.29	86.2461	177.163	78.1814	82.7821	53.7527	51.1868	52.4729
WEMCAU	0.727421	2.6527	3.77781	0.015973	0.0649076	0.105735	0.577149	1.73698	3.88478	0.0151722	0.128465	0.481297	0.20031	1.44635	3.5109	0.0238212	0.139758	0.211929	258.064	231.59	202.464	215.559	76.6188	45.7384	47.6504	58.6445	93.8764	1.92528	1.15983	1.1251	2.1478	445.876	88.8647	227.793	98.2371	72.5781	66.7728	29.782	55.2877
WEMDOJ	0.221906	1.4643	3.45345	0.0117123	0.0820408	0.20459	1.46733	1.91398	3.88966	0.011248	0.10247	0.489458	0.161739	1.52926	4.76667	0.0155752	0.127271	0.262411	107.363	101.141	95.6525	739.234	105.845	45.0322	58.8447	68.0891	102.934	1.24239	0.446652	1.98916	1.97567	125.657	47.2757	190.268	88.9689	84.8456	23.3362	57.5991	50.793
WEMDUP	0.508216	2.40855	3.99738	0.0125891	0.0647899	0.114466	1.64535	2.65887	6.15397	0.0122518	0.100759	0.216115	1.76446	3.56296	4.75342	0.0120185	0.0158269	0.0225077	228.76	210.657	197.892	761.003	149.534	161.36	831.94	1275.69	1196.75	1.90033	1.01352	1.58883	3.4951	400.318	151.556	314.417	563.971	78.8995	38.1185	39.7469	56.7942
WEMFAX	0.199028	1.33116	3.24319	0.0116173	0.0825957	0.216798	0.563567	1.57323	3.43537	0.0109883	0.100548	0.530141	0.0637005	0.592382	2.38776	0.0123812	0.10568	0.288608	97.0819	91.3271	84.7706	290.632	88.6634	36.7206	29.1547	31.7642	46.8824	1.13213	1.00966	1.91203	1.86214	103.394	89.5197	162.084	68.379	85.0485	64.1776	58.9553	54.205
WEMFEB	0.61661	2.53105	3.96382	0.0122292	0.0566725	0.0963897	1.6411	3.00271	6.52015	0.0123353	0.0947866	0.160996	3.02143	4.27919	4.96386	0.00468293	0.00454983	0.0115083	285.721	253.079	233.029	753.897	179.512	229.493	3656.14	5329.6	2444.19	1.91444	1.36162	1.43277	3.51744	484.504	244.427	333.876	807.229	75.6381	45.3462	36.1461	53.9472
WEMFIF	0.262374	1.58349	3.33859	0.0119737	0.0774922	0.183742	1.10204	1.79637	3.64925	0.011122	0.101242	0.480258	0.117386	0.986021	3.24541	0.0148371	0.111241	0.234973	124.171	115.794	102.964	561.494	100.545	43.0583	44.8328	50.2285	78.2671	1.32111	0.69432	1.7551	1.85289	152.977	69.8106	180.712	79.7821	83.4306	38.6514	52.5702	50.7744
WENKEH	1.10026	1.30984	2.27108	0.00797407	0.0696093	0.227796	1.92511	2.3707	3.34116	0.00808483	0.058697	0.111001	0.500714	0.941937	1.64005	0.010121	0.0670653	0.137596	781.888	106.63	56.4953	1349.31	228.87	170.569	280.345	79.5888	67.543	0.209579	0.445591	0.961232	0.970457	22.3474	101.982	54.3051	165.53	16.0003	18.7957	42.325	29.0455
WENKOR	0.663304	1.04762	2.06175	0.00802901	0.0661871	0.235738	0.757144	1.54022	2.72848	0.0116859	0.0743811	0.175683	0.0237032	0.21731	1.13335	0.00968296	0.0788387	0.232287	468.143	89.6926	49.5603	367.149	117.341	88.0072	13.8716	15.6195	27.6482	0.384311	0.78308	1.01414	1.18826	34.4699	91.8873	50.2611	104.575	36.6844	50.842	49.1882	43.5502
WIKXUJ	0.763826	1.37496	2.44668	0.0147764	0.085194	0.146239	0.867616	1.46664	3.0488	0.014177	0.0944663	0.20188	1.48762	2.09586	3.06315	0.0125401	0.0713247	0.14514	292.923	91.4551	94.8069	346.794	87.9782	85.5783	672.23	166.513	119.594	0.611131	0.599026	1.07172	1.58216	55.891	52.7012	101.607	135.399	44.4473	40.8434	43.8031	51.8945
KIYMIQ	0.0366651	0.261947	0.663191	0.0150578	0.0979474	0.208301	0.0366862	0.261506	0.665291	0.0152052	0.0978746	0.207274	0.184062	1.55256	3.9058	0.00914023	0.0756338	0.171781	2.43496	2.67436	3.18381	2.41274	2.67185	3.20972	114.113	116.321	128.843	0.225282	0.22482	0.401245	0.403784	0.602485	0.600686	1.27749	1.29603	86.0029	85.9712	60.5021	60.6929
LENKIA	0.00756886	0.0642352	0.251668	0.00250786	0.0217584	0.109282	0.00766185	0.0645226	0.251642	0.00244105	0.021892	0.109971	0.0650549	0.687341	3.57495	0.0266312	0.236519	0.521275	3.01805	2.95221	2.30293	3.13876	2.94732	2.28825	13.8426	16.4677	38.8624	0.0566663	0.0568608	0.187433	0.187119	0.167291	0.167587	0.431644	0.428175	88.217	88.1253	74.4762	74.3593
XIGFOJ	0.0201536	0.190079	1.56594	0.0183128	0.175782	1.37942	0.0199875	0.190602	1.56416	0.0183521	0.175658	1.37805	0.017836	0.169151	1.27821	0.0154265	0.149921	1.16944	1.10052	1.08134	1.13521	1.08911	1.08507	1.13505	6.55173	6.39353	6.19371	0.169926	0.170615	1.37586	1.37356	0.183747	0.18513	1.5619	1.55906	89.3973	89.5135	87.8616	87.8144

## Sheet: Table 3
	With missing hydrogen atoms (CO2 uptake, mol/kg)			Without missing hydrogen atoms (CO2 uptake, mol/kg)			Ratio=With/Without
MOF	@0.1 bar	@1 bar	@10 bar	@0.1 bar	@1 bar	@10 bar	@0.1 bar	@1 bar	@10 bar	With (PLD, Å)	Without (PLD, Å)	With (LCD, Å)	Without (LCD, Å)
CUIMDZ01	0.0225577	0.170219	0.551999	0.0221692	0.169759	0.552517	1.01752	1.00271	0.999064	4.11986	3.79593	4.56464	4.5789
EGELUY	2.81102	12.395	14.5473	2.78616	12.3859	14.5111	1.00892	1.00073	1.00249	6.86607	6.77944	7.32559	7.18938
EYUWAW	1.03386	5.8547	8.74148	1.03956	5.85775	8.75912	0.994521	0.99948	0.997987	4.52997	4.50984	6.01873	5.99158
KEJBOQ	0.531742	2.62265	4.69096	0.53565	2.61787	4.68972	0.992706	1.00183	1.00026	3.9347	3.92132	5.17871	5.11283
MAVNUU	0.37189	3.00272	7.30251	0.370914	2.99977	7.30375	1.00263	1.00098	0.999831	6.67882	6.25675	7.49883	7.52328
MINVUA	0.151924	1.58724	7.86739	0.151292	1.59006	7.8788	1.00418	0.998227	0.998551	6.54626	6.55075	7.00848	6.96277
MINVUA01	0.148981	1.57525	7.83847	0.148768	1.56824	7.82347	1.00144	1.00447	1.00192	6.54364	6.55075	7.01168	6.96277
OCUNAC	0.139051	1.05409	6.67295	0.141027	1.05818	6.68688	0.985986	0.996139	0.997917	14.0466	13.8445	36.1506	33.5598
OLEKUM	0.220125	2.38043	8.39222	0.196984	2.13334	8.13895	1.11748	1.11583	1.03112	5.7276	5.70118	6.88265	6.85169
SABVUN	1.61399	9.04323	12.0679	1.22809	8.39883	11.8087	1.31423	1.07672	1.02195	6.76477	6.68014	7.01984	6.99027
SAQQOR	0.569375	3.51208	13.8821	0.563985	3.53524	13.8806	1.00956	0.993448	1.00011	9.07282	9.05214	10.6865	10.6576
VACFOV	0.413956	3.15997	11.2865	0.415378	3.15453	11.3073	0.996578	1.00172	0.998156	7.51001	6.80377	7.84547	7.04016
VACFUB	0.0784202	0.894526	4.87885	0.0787585	0.895551	4.85989	0.995705	0.998856	1.0039	8.34107	8.31325	8.50715	8.48092
XESKEN	0.193162	2.20905	8.28006	0.180011	2.04629	8.14402	1.07306	1.07954	1.0167	9.36375	9.36375	9.91621	9.89763

## Sheet: Table 4
	With missing hydrogen atoms (CO2 uptake, mol/kg) Mixture (CO2/CH4)			With missing hydrogen atoms (CH4 uptake, mol/kg) Mixture (CO2/CH4)			Without missing hydrogen atoms (CO2 uptake, mol/kg) Mixture (CO2/CH4)			Without missing hydrogen atoms (CH4 uptake, mol/kg) Mixture (CO2/CH4)			With missing hydrogen atoms (CO2/CH4 Selectivities)			Without missing hydrogen atoms (CO2/CH4 Selectivities)			Working Capacity (CO2, mol/kg) @ VSA		Working Capacity (CO2, mol/kg) @ PSA		APS (CO2, mol/kg) @ VSA		APS (CO2, mol/kg) @ PSA		Regenerability (CO2, %) @ VSA		Regenerability (CO2, %) @ PSA
MOF	@0.1 bar	@1 bar	@10 bar	@0.1 bar	@1 bar	@10 bar	@0.1 bar	@1 bar	@10 bar	@0.1 bar	@1 bar	@10 bar	@0.1 bar	@1 bar	@10 bar	@0.1 bar	@1 bar	@10 bar	With	Without	With	Without	With	Without	Without	With	Without	With	Without	With
CUIMDZ01	0.0114562	0.0943846	0.339091	0.00491032	0.0430269	0.184987	0.0115357	0.0939466	0.33864	0.00507266	0.0428744	0.183998	2.3331	2.19362	1.83306	2.27409	2.1912	1.84045	0.0829284	0.0824109	0.244706	0.244694	0.181913	0.180579	0.44856	0.450347	87.8622	87.721	72.1654	72.2577
EGELUY	1.16185	10.8238	13.744	0.0892108	0.248938	0.272857	1.16805	10.8141	13.7262	0.0889469	0.249559	0.275911	13.0236	43.4797	50.3707	13.132	43.3328	49.7486	9.66192	9.64604	2.92025	2.9121	420.097	417.99	147.095	144.873	89.2658	89.1988	21.2474	21.2156
EYUWAW	0.52012	4.06246	7.72636	0.0458061	0.292	0.433581	0.520083	4.07162	7.71969	0.0457102	0.291379	0.433175	11.3548	13.9125	17.8199	11.3778	13.9736	17.8212	3.54234	3.55154	3.6639	3.64806	49.283	49.6279	65.2903	65.0128	87.1969	87.2266	47.4207	47.2566
KEJBOQ	0.284238	1.63222	3.29412	0.0856832	0.511344	1.11007	0.283769	1.63028	3.29142	0.0857841	0.511134	1.10943	3.31731	3.19202	2.96749	3.30795	3.18953	2.96678	1.34798	1.34651	1.6619	1.66114	4.30279	4.29474	4.93168	4.92825	82.5858	82.5938	50.4505	50.4689
MAVNUU	0.18651	1.55729	5.29301	0.0690523	0.49845	1.14739	0.187502	1.56419	5.30024	0.0694079	0.498264	1.14587	2.701	3.12427	4.6131	2.70145	3.13929	4.6255	1.37078	1.37669	3.73571	3.73605	4.28269	4.32184	17.2332	17.2811	88.0234	88.0129	70.5783	70.4882
MINVUA	0.075905	0.774619	5.21603	0.0290994	0.273639	1.16876	0.0756111	0.777677	5.1972	0.0291329	0.273776	1.16682	2.60848	2.83081	4.46287	2.59538	2.84056	4.45415	0.698714	0.702066	4.44141	4.41952	1.97792	1.99426	19.8214	19.6852	90.201	90.2773	85.1493	85.0366
MINVUA01	0.0745897	0.764632	5.15405	0.0289863	0.273188	1.17717	0.0744184	0.765943	5.15532	0.0289863	0.273107	1.17666	2.57327	2.79893	4.37835	2.56736	2.80455	4.38133	0.690042	0.691525	4.38941	4.38937	1.93138	1.93941	19.2184	19.2313	90.245	90.2841	85.1644	85.1427
OCUNAC	0.0726699	0.573644	3.38646	0.0262925	0.210918	1.51209	0.0724043	0.573872	3.39867	0.026296	0.210455	1.41219	2.7639	2.71975	2.23958	2.75343	2.72682	2.40667	0.500974	0.501468	2.81282	2.8248	1.36252	1.36741	6.29954	6.79837	87.3319	87.3832	83.0607	83.1148
OLEKUM	0.0992981	1.01359	5.77178	0.0298541	0.280107	1.04606	0.099882	1.0134	5.77044	0.0298872	0.280815	1.04466	3.32611	3.61858	5.51762	3.34197	3.60879	5.52376	0.914291	0.913521	4.75819	4.75704	3.30843	3.2967	26.2539	26.2767	90.2033	90.1439	82.4389	82.438
SABVUN	0.59896	5.78546	10.3642	0.0950685	0.570143	0.754431	0.600981	5.77306	10.3575	0.0946395	0.569424	0.758463	6.3003	10.1474	13.7377	6.35021	10.1384	13.6559	5.1865	5.17208	4.57872	4.58444	52.6293	52.4368	62.9013	62.6047	89.6471	89.5899	44.1783	44.262
SAQQOR	0.304594	2.15288	9.27749	0.0364535	0.345478	1.75472	0.304463	2.14321	9.26498	0.0363618	0.346588	1.75406	8.35569	6.2316	5.28715	8.37314	6.18375	5.28202	1.84829	1.83875	7.12461	7.12177	11.5178	11.3704	37.6688	37.6173	85.8518	85.7941	76.7946	76.8676
VACFOV	0.211894	1.65364	7.6457	0.0736478	0.531407	1.78643	0.212987	1.65309	7.648	0.0739173	0.529046	1.78161	2.87712	3.11181	4.27988	2.88143	3.12465	4.29274	1.44175	1.4401	5.99206	5.99491	4.48644	4.49981	25.6453	25.7346	87.1862	87.1158	78.3716	78.3854
VACFUB	0.0392891	0.42145	3.13196	0.0185531	0.186654	0.905176	0.0391023	0.42337	3.13665	0.0185523	0.186805	0.906666	2.11766	2.25792	3.46005	2.10768	2.26637	3.45954	0.382161	0.384268	2.71051	2.71328	0.862889	0.870892	9.37848	9.3867	90.6776	90.764	86.5435	86.5025
XESKEN	0.0923242	0.986133	6.31751	0.0101091	0.107427	0.592197	0.0939632	0.992369	6.3199	0.0101943	0.107693	0.591764	9.13277	9.17959	10.6679	9.21725	9.21483	10.6798	0.893809	0.898406	5.33138	5.32753	8.2048	8.27865	56.8746	56.8967	90.6377	90.5314	84.3905	84.2977
	With missing hydrogen atoms (CO2 uptake, mol/kg) Mixture (CO2/H2)			With missing hydrogen atoms (H2 uptake, mol/kg) Mixture (CO2/H2)			Without missing hydrogen atoms (CO2 uptake, mol/kg) Mixture (CO2/H2)			Without missing hydrogen atoms (H2 uptake, mol/kg) Mixture (CO2/H2)			With missing hydrogen atoms (CO2/H2 Selectivities)			Without missing hydrogen atoms (CO2/H2 Selectivities)			Working Capacity (CO2, mol/kg) @ VSA		Working Capacity (CO2, mol/kg) @ PSA		APS (CO2, mol/kg) @ VSA		APS (CO2, mol/kg) @ PSA		Regenerability (CO2, %) @ VSA		Regenerability (CO2, %) @ PSA
MOF	@0.1 bar	@1 bar	@10 bar	@0.1 bar	@1 bar	@10 bar	@0.1 bar	@1 bar	@10 bar	@0.1 bar	@1 bar	@10 bar	@0.1 bar	@1 bar	@10 bar	@0.1 bar	@1 bar	@10 bar	With	Without	With	Without	With	Without	Without	With	Without	With	Without	With
CUIMDZ01	0.00350373	0.0338316	0.219986	0.000307004	0.00311816	0.0228731	0.00348082	0.0333492	0.220067	0.000303815	0.00304945	0.0227931	64.6717	61.4825	54.5001	64.9234	61.9713	54.7116	0.0303278	0.0298683	0.186154	0.186718	1.86463	1.85098	10.1454	10.2156	89.6436	89.5625	84.621	84.8459
EGELUY	0.321786	4.93423	12.8564	0.0050692	0.0346149	0.0465685	0.3193	4.95498	12.8587	0.00508498	0.0342264	0.0462803	359.712	807.762	1564.43	355.826	820.369	1574.45	4.61244	4.63568	7.92221	7.90376	3725.75	3802.97	12393.7	12444.1	93.4785	93.556	61.6206	61.466
EYUWAW	0.16207	1.54078	6.5201	0.00327213	0.0276933	0.0890597	0.163381	1.53834	6.52359	0.00323026	0.0277	0.0890191	280.673	315.279	414.859	286.611	314.704	415.27	1.37871	1.37496	4.97932	4.98525	434.679	432.706	2065.72	2070.23	89.4813	89.3794	76.3687	76.4188
KEJBOQ	0.090757	0.743539	3.00424	0.00266624	0.0221258	0.0959671	0.090699	0.739604	3.00313	0.00267446	0.0221378	0.0959356	192.889	190.429	177.394	192.174	189.319	177.387	0.652782	0.648905	2.2607	2.26352	124.308	122.85	401.035	401.519	87.7939	87.7368	75.2503	75.3722
MAVNUU	0.0572225	0.550725	3.79356	0.00366499	0.0343349	0.17958	0.057056	0.550615	3.79251	0.00367127	0.034197	0.178883	88.4752	90.8923	119.706	88.0669	91.2404	120.14	0.493503	0.493559	3.24283	3.2419	44.8556	45.0325	388.186	389.481	89.6096	89.6378	85.4826	85.4815
MINVUA	0.0226864	0.229686	2.31321	0.00344693	0.0335256	0.250783	0.0226573	0.227788	2.30801	0.0034298	0.0332793	0.251014	37.2959	38.8228	52.2689	37.4341	38.7868	52.1036	0.207	0.20513	2.08352	2.08022	8.03631	7.95634	108.903	108.387	90.1229	90.0533	90.0706	90.1305
MINVUA01	0.0219739	0.225269	2.27172	0.00342946	0.0334814	0.25156	0.0222014	0.22511	2.26457	0.00337225	0.033443	0.251831	36.3087	38.1263	51.1731	37.3068	38.1431	50.9571	0.203295	0.202908	2.04646	2.03946	7.75088	7.73956	104.723	103.925	90.2454	90.1375	90.0838	90.0595
OCUNAC	0.0230032	0.20672	1.40345	0.00773483	0.0754806	0.719164	0.0231225	0.207349	1.39695	0.00777999	0.0750018	0.717662	16.8525	15.5194	11.0585	16.8416	15.666	11.0303	0.183717	0.184227	1.19673	1.1896	2.85119	2.8861	13.234	13.1217	88.8723	88.8485	85.2705	85.157
OLEKUM	0.0329913	0.327927	3.33368	0.00354885	0.0342877	0.232609	0.0298509	0.297623	3.00747	0.00347421	0.033788	0.237435	52.6793	54.196	81.213	48.6888	49.9151	71.7769	0.294936	0.267772	3.00575	2.70985	15.9843	13.3659	244.106	194.505	89.9394	89.9703	90.1632	90.1039
SABVUN	0.222604	2.52582	9.74206	0.00539238	0.0422641	0.0837737	0.177584	1.94631	9.1972	0.0050255	0.0424405	0.0977169	233.927	338.656	658.978	200.241	259.872	533.351	2.30322	1.76873	7.21624	7.25089	779.999	459.642	4755.34	3867.27	91.1869	90.8759	74.073	78.838
SAQQOR	0.0950443	0.800012	4.52265	0.00513812	0.0488705	0.382666	0.0953744	0.814231	4.52896	0.00515546	0.0487467	0.382463	104.821	92.7636	66.9732	104.832	94.6522	67.1021	0.704968	0.718857	3.72264	3.71473	65.3954	68.0413	249.317	249.266	88.1196	88.2866	82.311	82.0217
VACFOV	0.0654869	0.609965	4.14607	0.00479838	0.0450207	0.30378	0.0658634	0.613055	4.15109	0.00474218	0.0451459	0.304485	77.3371	76.7751	77.3402	78.7034	76.9501	77.2545	0.544478	0.547191	3.5361	3.53803	41.8024	42.1064	273.483	273.329	89.2638	89.2565	85.2881	85.2315
VACFUB	0.0117085	0.11959	1.30161	0.00212348	0.0211729	0.166153	0.0116687	0.11926	1.31327	0.00215305	0.0212691	0.165983	31.2448	32.0067	44.3914	30.711	31.7741	44.8351	0.107881	0.107591	1.18202	1.19401	3.45292	3.41862	52.4715	53.5335	90.2095	90.2158	90.8122	90.9188
XESKEN	0.0294316	0.300923	3.26434	0.00237128	0.0230225	0.168251	0.0280641	0.283042	3.05929	0.00231258	0.0227446	0.169668	70.3328	74.0678	109.942	68.7672	70.5179	102.176	0.271491	0.254977	2.96341	2.77625	20.1088	17.9805	325.804	283.665	90.2196	90.0848	90.7815	90.7481
	With missing hydrogen atoms (CO2 uptake, mol/kg) Mixture (CO2/N2)			With missing hydrogen atoms (N2 uptake, mol/kg) Mixture (CO2/N2)			Without missing hydrogen atoms (CO2 uptake, mol/kg) Mixture (CO2/N2)			Without missing hydrogen atoms (N2 uptake, mol/kg) Mixture (CO2/N2)			With missing hydrogen atoms (CO2/N2 Selectivities)			Without missing hydrogen atoms (CO2/N2 Selectivities)			Working Capacity (CO2, mol/kg) @ VSA		Working Capacity (CO2, mol/kg) @ PSA		APS (CO2, mol/kg) @ VSA		APS (CO2, mol/kg) @ PSA		Regenerability (CO2, %) @ VSA		Regenerability (CO2, %) @ PSA
MOF	@0.1 bar	@1 bar	@10 bar	@0.1 bar	@1 bar	@10 bar	@0.1 bar	@1 bar	@10 bar	@0.1 bar	@1 bar	@10 bar	@0.1 bar	@1 bar	@10 bar	@0.1 bar	@1 bar	@10 bar	With	Without	With	Without	With	Without	Without	With	Without	With	Without	With
CUIMDZ01	0.00350402	0.0326007	0.186345	0.00214526	0.0204066	0.128318	0.00343763	0.0326876	0.185895	0.00211772	0.020406	0.127954	9.25581	9.0528	8.22919	9.19854	9.07721	8.23266	0.0290966	0.02925	0.153744	0.153207	0.263406	0.265508	1.26519	1.2613	89.2517	89.4834	82.5052	82.416
EGELUY	0.317069	4.82168	12.5766	0.0475419	0.355098	0.318432	0.318445	4.79692	12.5717	0.0475526	0.353062	0.318334	37.7925	76.9445	223.808	37.9479	76.9908	223.788	4.50461	4.47847	7.75494	7.77473	346.605	344.801	1735.62	1739.89	93.4241	93.3615	61.6616	61.8434
EYUWAW	0.161065	1.52087	6.07785	0.0248386	0.207878	0.543798	0.160747	1.52846	6.08373	0.0247943	0.208323	0.544038	36.7454	41.4584	63.3345	36.7382	41.5763	63.3678	1.35981	1.36772	4.55698	4.55527	56.3753	56.8645	288.614	288.657	89.4097	89.4831	74.9768	74.8762
KEJBOQ	0.0901287	0.707371	2.48004	0.0307617	0.241174	0.843285	0.090026	0.70606	2.47627	0.0309557	0.241987	0.843672	16.6028	16.6205	16.6652	16.4799	16.534	16.6323	0.617242	0.616034	1.77267	1.77021	10.2589	10.1855	29.5419	29.4426	87.2586	87.2495	71.4774	71.487
MAVNUU	0.0565007	0.531486	3.11647	0.0312192	0.275638	1.15754	0.0568801	0.529265	3.10926	0.0312779	0.276562	1.15875	10.2556	10.9265	15.2565	10.3051	10.8445	15.2053	0.474985	0.472385	2.58499	2.58	5.18992	5.12277	39.4377	39.2297	89.3693	89.253	82.9459	82.9778
MINVUA	0.0223607	0.225953	2.01935	0.0176176	0.170468	1.13844	0.0223983	0.226314	2.01312	0.0177248	0.171372	1.13516	7.19227	7.51108	10.0515	7.16081	7.48342	10.0494	0.203592	0.203915	1.7934	1.78681	1.5292	1.52598	18.0263	17.9564	90.1038	90.103	88.8106	88.7581
MINVUA01	0.0221551	0.222555	1.98574	0.0175165	0.17019	1.13873	0.0219181	0.222464	1.99011	0.0176066	0.170595	1.13641	7.16727	7.41021	9.88162	7.05431	7.38959	9.92364	0.2004	0.200546	1.76319	1.76765	1.485	1.48195	17.4232	17.5415	90.0451	90.1476	88.7924	88.8215
OCUNAC	0.0232774	0.200712	1.25839	0.0198841	0.182806	1.45217	0.0229087	0.200549	1.26973	0.0196873	0.182618	1.44734	6.63372	6.22174	4.9105	6.59389	6.22306	4.97129	0.177435	0.177641	1.05768	1.06918	1.10396	1.10547	5.19372	5.31521	88.4026	88.577	84.05	84.2054
OLEKUM	0.0327063	0.321255	2.86947	0.019551	0.184448	1.16122	0.0296106	0.290457	2.60844	0.0182655	0.172814	1.12999	9.47958	9.8697	14.0028	9.18634	9.52423	13.0807	0.288548	0.260847	2.54822	2.31798	2.84789	2.48437	35.682	30.3209	89.8192	89.8055	88.8044	88.8647
SABVUN	0.220712	2.44241	9.03137	0.0552427	0.441311	0.779827	0.176478	1.88452	8.4404	0.0472375	0.394957	0.834266	22.6401	31.3618	65.6271	21.1706	27.0383	57.3305	2.2217	1.70804	6.58897	6.55588	69.6765	46.1825	432.415	375.852	90.9633	90.6354	72.9564	77.6726
SAQQOR	0.096436	0.791015	4.21933	0.0238705	0.224826	1.63001	0.0953279	0.794681	4.21426	0.0239624	0.224066	1.62976	22.8931	19.9372	14.6683	22.5433	20.0976	14.6529	0.694579	0.699353	3.42831	3.41958	13.848	14.0553	50.2875	50.1068	87.8086	88.0043	81.2526	81.143
VACFOV	0.0652178	0.592459	3.59336	0.033179	0.296159	1.61363	0.0652602	0.588448	3.60297	0.0331384	0.297379	1.61381	11.1386	11.336	12.619	11.1595	11.2131	12.6513	0.527242	0.523188	3.0009	3.01452	5.97682	5.86656	37.8684	38.1376	88.992	88.9098	83.5124	83.6677
VACFUB	0.0116115	0.119386	1.16305	0.0109419	0.109622	0.804659	0.0114622	0.118263	1.16155	0.011072	0.108498	0.802865	6.01344	6.17135	8.19059	5.86638	6.17667	8.19828	0.107774	0.106801	1.04367	1.04329	0.665113	0.659672	8.54826	8.55316	90.274	90.3078	89.7352	89.8185
XESKEN	0.0299001	0.296593	3.12036	0.00856945	0.086417	0.687749	0.0274495	0.283724	2.91155	0.00823427	0.0823938	0.669309	19.7719	19.4486	25.71	18.8902	19.5132	24.6505	0.266693	0.256274	2.82377	2.62782	5.1868	5.00074	72.5991	64.7771	89.9188	90.3253	90.4949	90.2552

## Sheet: Table 5
		With Charge Balancing Ions (CO2 uptake, mol/kg)			Without Charge Balancing Ions (CO2 uptake, mol/kg)			Ratio=Without/With
MOF	Name of CBIs	@0.1 bar	@1 bar	@10 bar	@0.1 bar	@1 bar	@10 bar	@0.1 bar	@1 bar	@10 bar	With (PLD, Å)	Without (PLD, Å)	With (LCD, Å)	Without (LCD, Å)
BEPLUF	CHOO-	0.0916634	0.990587	5.89922	0.13175	1.37857	8.77766	1.43733	1.39167	1.48794	9.74472	10.4574	9.83528	10.5466
BEPMAM	CHOO-	0.0853794	0.928327	5.54463	0.132307	1.39373	8.53809	1.54964	1.50134	1.53989	9.56872	10.233	9.64411	10.3576
BEPNIV	CH3COO-	0.0977363	0.918983	3.77856	0.132636	1.37295	8.41541	1.35708	1.49399	2.22715	8.04133	10.1988	8.14086	10.3222
BEPNOB	CHOO-	0.0791199	0.865138	5.41567	0.116977	1.24186	8.34244	1.47848	1.43544	1.54043	9.55131	10.2313	9.65893	10.3631
BEPPIX	CH3COO-	0.166149	1.39181	3.7265	0.193246	2.23584	8.06115	1.16309	1.60643	2.16319	7.60093	9.63706	7.71851	9.77409
BEPPOD	CHOO-	0.147964	1.60933	5.411	0.181498	2.08441	8.26615	1.22664	1.29521	1.52766	9.49812	9.89092	9.61883	10.0362
BIFKEI	CF3 SO3-	2.61131	3.37832	3.84865	1.92775	6.71188	9.33799	0.738231	1.98675	2.4263	3.07096	4.3432	4.43564	5.92703
CIJVOH	SO42-	0.102082	0.981163	3.74786	0.141084	1.64795	7.74516	1.38207	1.67959	2.06656	3.14257	4.40026	4.05055	5.67314
CIJVOH01	SO42-	0.12624	1.16403	3.9448	0.143334	1.69437	7.88256	1.13541	1.45561	1.99821	3.25712	4.43683	4.13064	5.72943
CIVTEH	NO3-	0.790613	3.41637	4.98431	2.15403	5.09807	6.62592	2.72451	1.49225	1.32936	3.53705	4.01709	5.29777	5.3881
FIFNUE	CHOO-	1.25407	5.13311	6.41123	2.14924	7.3986	9.16209	1.71381	1.44135	1.42907	3.95564	3.95118	4.78254	4.8017
FIFNUE01	CHOO-	1.19739	5.04389	6.39319	2.01054	7.30489	9.11454	1.67911	1.44827	1.42566	3.93198	3.93215	4.67035	4.79076
HEKTAU	CH3COO-	1.90486	3.739	4.8508	2.29267	6.02675	8.02712	1.20359	1.61186	1.65481	3.91007	4.04271	4.8738	4.87289
IDAGEA	OH-	0.188474	0.875424	1.85272	0.352513	2.4381	5.30318	1.87035	2.78505	2.86237	3.38888	5.9816	4.38787	6.40396
IKOSOQ	NO3-	1.27504	2.75979	3.81352	1.54843	4.28623	6.20214	1.21442	1.5531	1.62636	3.64261	4.15785	4.90404	5.18747
KIPZEQ	NO3-	1.349	2.81462	3.52789	1.66126	4.00849	4.83085	1.23148	1.42417	1.36933	4.0897	4.0897	4.90138	4.90958
LIQCUK	NO3-	0.385209	2.29191	3.65215	1.92709	4.65061	6.82247	5.00272	2.02914	1.86807	5.77643	5.77662	7.72609	7.72615
MOXNUJ	CH3COO-	1.5251	5.67762	7.18085	0.577753	6.40084	15.9478	0.378828	1.12738	2.22088	3.50499	7.13556	4.06332	7.33692
SENWAL	NO3-	0.134819	1.46708	11.3361	0.0853938	0.914194	14.5029	0.633396	0.623138	1.27935	5.10228	7.37341	6.93975	8.65122
TEDGUG	C4H12N+ (DMA)	0.12233	1.27504	11.3798	0.145707	1.52368	16.2263	1.1911	1.19501	1.42589	5.37593	5.38482	14.4036	14.4006
UXUPEJ	CF3 SO3-	1.5921	4.17018	5.75564	0.536401	6.06684	16.7957	0.336915	1.45482	2.91813	5.79381	5.78241	6.1194	7.33818
UXUPIN	CF3 SO3-	1.67533	4.1555	5.67755	0.532101	6.12788	17.3527	0.317609	1.47464	3.05637	5.72951	5.72246	6.05873	7.3374
VEHRIL	SiMo12O404+	0.941702	1.47657	2.14294	3.34037	7.95198	12.4901	3.54716	5.38544	5.82849	2.55333	4.02227	4.28303	8.79809
VEHXEN	[Fe(1,10-phen)3]2+, [2-MepyH]+	0.179505	1.67532	5.48074	0.0491478	0.518895	8.30175	0.273797	0.309729	1.51471	6.48813	7.04491	8.78035	9.30754
VEXYON	[Cu(dmf)6]2+	0.0390471	0.412589	6.36771	0.258717	2.0406	10.8332	6.62577	4.94583	1.70126	6.04306	6.04579	15.215	15.4154
XEDPON	CH3COO-	0.994869	2.58618	3.49853	0.890843	5.78627	9.23324	0.895438	2.23738	2.63918	3.39158	4.32366	6.45468	7.48304
XINWUO	CH3COO-	0.432248	1.43772	2.0849	0.154031	1.64039	7.4368	0.356348	1.14097	3.56698	3.10036	4.28799	3.58402	6.28616

## Sheet: Table 6
	With Charge Balancing Ions (CO2 uptake, mol/kg) Mixture (CO2/CH4)			With Charge Balancing Ions (CH4 uptake, mol/kg) Mixture (CO2/CH4)			Without Charge Balancing Ions (CO2 uptake, mol/kg) Mixture (CO2/CH4)			Without Charge Balancing Ions (CH4 uptake, mol/kg) Mixture (CO2/CH4)			With Charge Balancing Ions (CO2/CH4 Selectivities)			Without Charge Balancing Ions (CO2/CH4 Selectivities)				Working Capacity (CO2, mol/kg) @ VSA		Working Capacity (CO2, mol/kg) @ PSA		APS (CO2, mol/kg) @ VSA		APS (CO2, mol/kg) @ PSA		Regenerability (CO2, %) @ VSA		Regenerability (CO2, %) @ PSA
MOF	@0.1 bar	@1 bar	@10 bar	@0.1 bar	@1 bar	@10 bar	@0.1 bar	@1 bar	@10 bar	@0.1 bar	@1 bar	@10 bar	@0.1 bar	@1 bar	@10 bar	@0.1 bar	@1 bar	@10 bar		With	Without	With	Without	With	Without	With	Without	With	Without	With	Without
BEPLUF	0.0462599	0.476862	3.69985	0.0217875	0.213435	1.04949	0.0664944	0.670687	5.25695	0.0365161	0.350185	1.74504	2.12324	2.23422	3.52537	1.82096	1.91524	3.01252	0.857635	0.430602	0.604193	3.22299	4.58626	0.96206	1.15717	11.3622	13.8162	90.2991	90.0856	87.1113	87.2419
BEPMAM	0.0429983	0.445592	3.47185	0.0202455	0.200576	0.984431	0.0663919	0.670303	5.1577	0.0395723	0.381533	1.80509	2.12385	2.22156	3.52676	1.67774	1.75687	2.85731	0.789952	0.402594	0.603911	3.02626	4.4874	0.894386	1.06099	10.6729	12.8219	90.3503	90.0952	87.1656	87.0039
BEPNIV	0.0494313	0.469755	2.4425	0.0190061	0.174764	0.652616	0.0666698	0.662246	5.02772	0.0387862	0.36726	1.74401	2.60082	2.68795	3.74263	1.71891	1.80321	2.88285	0.66091	0.420324	0.595576	1.97274	4.36548	1.12981	1.07395	7.38324	12.585	89.4772	89.9328	80.7674	86.8281
BEPNOB	0.0399403	0.415983	3.3526	0.0193747	0.192728	0.983563	0.0589798	0.603067	4.92239	0.0355229	0.344863	1.77544	2.06147	2.15839	3.40863	1.66033	1.74872	2.7725	0.80541	0.376043	0.544087	2.93662	4.31933	0.811649	0.951454	10.0098	11.9753	90.3986	90.22	87.5922	87.7485
BEPPIX	0.0861122	0.739416	2.67576	0.0268349	0.213041	0.533566	0.0984406	1.02814	6.00205	0.0289391	0.286662	0.974137	3.20897	3.47077	5.01486	3.40164	3.5866	6.16141	1.06004	0.653304	0.929701	1.93634	4.97391	2.26747	3.33446	9.71048	30.6463	88.354	90.4254	72.3661	82.8702
BEPPOD	0.0754574	0.756415	3.9204	0.0242541	0.233203	0.765987	0.0933896	0.957535	6.01834	0.0298083	0.289465	1.08153	3.11112	3.2436	5.1181	3.13301	3.30795	5.56467	1.00703	0.680958	0.864145	3.16398	5.0608	2.20875	2.85855	16.1936	28.1617	90.0243	90.2469	80.7056	84.0897
BIFKEI	2.23833	3.12544	3.58106	0.0528956	0.0999972	0.132999	0.975649	5.11726	8.04527	0.135944	0.519597	0.580187	42.316	31.2553	26.9254	7.17685	9.84851	13.8667	0.169601	0.887105	4.14161	0.455622	2.92801	27.7267	40.7887	12.2678	40.6018	28.3834	80.9341	12.7231	36.3942
CIJVOH	0.0524362	0.503509	2.90225	0.00383544	0.0387129	0.270569	0.0710567	0.752513	5.65231	0.0222734	0.217836	1.0002	13.6715	13.0062	10.7264	3.1902	3.45449	5.65119	0.233347	0.451073	0.681457	2.39874	4.8998	5.86676	2.35409	25.73	27.6897	89.5858	90.5574	82.6511	86.6866
CIJVOH01	0.0634274	0.608682	3.09637	0.0056665	0.0558558	0.309916	0.0718328	0.766895	5.72028	0.022964	0.227858	1.05713	11.1934	10.8974	9.99098	3.12807	3.36567	5.41114	0.279457	0.545254	0.695062	2.48769	4.95339	5.94185	2.33935	24.8544	26.8035	89.5796	90.6333	80.3421	86.5934
CIVTEH	0.400672	2.25909	3.99184	0.120474	0.513645	0.690006	1.22573	4.10718	5.56151	0.133212	0.498784	0.744626	3.3258	4.39815	5.78523	9.20132	8.23437	7.46886	2.76665	1.85842	2.88145	1.73275	1.45433	8.17361	23.7269	10.0244	10.8622	82.264	70.1564	43.4074	26.15
FIFNUE	0.631073	3.80354	6.0739	0.0678208	0.225576	0.174552	1.08531	6.02276	8.3599	0.0660478	0.319815	0.500574	9.305	16.8615	34.7971	16.4322	18.832	16.7006	1.76595	3.17247	4.93745	2.27036	2.33714	53.4925	92.9822	79.0018	39.0317	83.4083	81.9799	37.3789	27.9566
FIFNUE01	0.6024	3.63001	6.05114	0.0638287	0.224279	0.1761	0.995179	5.86837	8.34491	0.0622	0.320355	0.501535	9.43775	16.1852	34.3619	15.9997	18.3183	16.6387	1.69528	3.02761	4.87319	2.42113	2.47654	49.0025	89.2686	83.1947	41.2065	83.405	83.0416	40.0112	29.6773
HEKTAU	1.17751	2.99082	4.10306	0.176437	0.354395	0.512766	1.25286	4.57252	6.76262	0.224449	0.646497	0.905449	6.67383	8.43922	8.00183	5.58192	7.07277	7.4688	0.83639	1.81331	3.31966	1.11224	2.1901	15.3029	23.4792	8.89997	16.3574	60.6292	72.6003	27.1076	32.3854
IDAGEA	0.102103	0.591061	1.46236	0.0082955	0.0516085	0.152086	0.185457	1.33752	3.77142	0.0690612	0.465385	0.930638	12.3082	11.4528	9.61536	2.6854	2.87401	4.05251	0.218179	0.488958	1.15207	0.871302	2.43389	5.59993	3.31105	8.37788	9.86336	82.7255	86.1343	59.5818	64.5353
IKOSOQ	0.831802	2.01207	2.96501	0.16639	0.434487	0.629812	0.874463	3.03045	4.92437	0.205968	0.623374	0.751815	4.99911	4.6309	4.70777	4.24564	4.86137	6.54998	0.849278	1.18026	2.15599	0.952944	1.89392	5.46569	10.481	4.48624	12.4052	58.6593	71.1441	32.1397	38.4602
KIPZEQ	0.783766	2.11944	2.8687	0.190632	0.410854	0.441627	0.907134	3.10021	4.07915	0.190336	0.489488	0.592791	4.11142	5.15862	6.49577	4.76597	6.33358	6.88127	1.1592	1.33567	2.19308	0.749266	0.978943	6.89023	13.89	4.86705	6.73637	63.0201	70.7396	26.1186	23.9987
LIQCUK	0.198657	1.27954	2.59041	0.0928401	0.536763	0.826551	1.25487	3.51295	5.71575	0.083433	0.415059	0.833558	2.13978	2.38381	3.134	15.0404	8.46374	6.85705	7.02897	1.08088	2.25809	1.31087	2.20279	2.57662	19.1119	4.10826	15.1046	84.4743	64.2788	50.6047	38.539
MOXNUJ	0.778278	4.53201	6.71453	0.0318034	0.170407	0.2541	0.295372	3.13641	13.0597	0.0408036	0.408232	1.17495	24.4715	26.5951	26.4247	7.23886	7.68292	11.1152	0.295808	3.75373	2.84104	2.18253	9.92332	99.8309	21.8275	57.6727	110.299	82.8271	90.5825	32.5045	75.9841
SENWAL	0.068292	0.708618	6.91399	0.0230781	0.234152	1.62467	0.0426766	0.444055	6.37643	0.0202679	0.206457	2.08183	2.95917	3.02632	4.25562	2.10562	2.15083	3.0629	0.711559	0.640326	0.401378	6.20538	5.93237	1.93783	0.863297	26.4077	18.1703	90.3626	90.3894	89.751	93.036
TEDGUG	0.0609114	0.609278	6.13848	0.0295473	0.288577	2.00753	0.0729009	0.733889	7.69289	0.0369189	0.363045	2.79036	2.06149	2.11132	3.05772	1.97462	2.02148	2.75695	0.957865	0.548366	0.660988	5.5292	6.959	1.15778	1.33617	16.9068	19.1856	90.0027	90.0665	90.0745	90.4602
UXUPEJ	1.09376	3.10624	4.70878	0.0920786	0.476587	0.603344	0.267162	2.83452	12.0978	0.106358	0.981887	2.51807	11.8786	6.51768	7.80447	2.51192	2.88681	4.80441	0.211466	2.01248	2.56736	1.60254	9.26333	13.1167	7.41149	12.507	44.5048	64.7882	90.5747	34.033	76.57
UXUPIN	1.16913	3.14555	4.65002	0.0891592	0.454785	0.585399	0.261764	2.8183	12.5249	0.103546	0.970358	2.52796	13.1129	6.91656	7.94335	2.528	2.90439	4.95455	0.192788	1.97642	2.55654	1.50447	9.70661	13.67	7.4252	11.9506	48.0919	62.8321	90.712	32.3541	77.4984
VEHRIL	0.855594	1.28044	1.93747	0.00142619	0.0092451	0.0195808	2.12664	6.2961	11.0233	0.0197348	0.190119	0.522558	599.915	138.499	98.9472	107.761	33.1166	21.0949	0.179627	0.424847	4.16946	0.657023	4.7272	58.8411	138.079	65.0106	99.7198	33.1797	66.2229	33.9115	42.8837
VEHXEN	0.0920779	0.826142	4.0998	0.0230599	0.196874	0.572973	0.0250647	0.251331	4.13951	0.00846846	0.0844717	0.891426	3.99298	4.1963	7.15531	2.95977	2.97533	4.64369	0.741244	0.734065	0.226267	3.27366	3.88818	3.08035	0.673218	23.424	18.0555	88.8545	90.0272	79.8492	93.9285
VEXYON	0.0197235	0.20254	2.61393	0.00967248	0.0977496	0.952099	0.128316	1.09669	5.52029	0.047505	0.367922	1.60424	2.03913	2.07203	2.74544	2.7011	2.98078	3.44107	1.32463	0.182817	0.968379	2.41139	4.42359	0.378802	2.88653	6.62032	15.2219	90.2619	88.2998	92.2515	80.1334
XEDPON	0.584595	1.9251	2.96081	0.113587	0.273523	0.359728	0.44991	3.49716	7.3315	0.127694	0.783714	1.25908	5.14666	7.03818	8.23071	3.52336	4.46229	5.82289	0.684591	1.34051	3.04725	1.03571	3.83435	9.43473	13.5977	8.52465	22.327	69.633	87.135	34.9807	52.2996
XINWUO	0.250251	1.12249	1.95125	0.000653636	0.00450926	0.0169949	0.0773081	0.770426	4.91048	0.0340218	0.313712	1.29301	382.859	248.93	114.814	2.27231	2.45584	3.79772	0.00593511	0.872241	0.693118	0.828758	4.14005	217.127	1.70219	95.1528	15.7228	77.7058	89.9655	42.4732	84.3106
	With Charge Balancing Ions (CO2 uptake, mol/kg) Mixture (CO2/H2)			With Charge Balancing Ions (H2 uptake, mol/kg) Mixture (CO2/H2)			Without Charge Balancing Ions (CO2 uptake, mol/kg) Mixture (CO2/H2)			Without Charge Balancing Ions (H2 uptake, mol/kg) Mixture (CO2/H2)			With Charge Balancing Ions (CO2/H2 Selectivities)			Without Charge Balancing Ions (CO2/H2 Selectivities)				Working Capacity (CO2, mol/kg) @ VSA		Working Capacity (CO2, mol/kg) @ PSA		APS (CO2, mol/kg) @ VSA		APS (CO2, mol/kg) @ PSA		Regenerability (CO2, %) @ VSA		Regenerability (CO2, %) @ PSA
MOF	@0.1 bar	@1 bar	@10 bar	@0.1 bar	@1 bar	@10 bar	@0.1 bar	@1 bar	@10 bar	@0.1 bar	@1 bar	@10 bar	@0.1 bar	@1 bar	@10 bar	@0.1 bar	@1 bar	@10 bar		With	Without	With	Without	With	Without	With	Without	With	Without	With	Without
BEPLUF	0.0137209	0.138721	1.45399	0.00247545	0.0243301	0.194898	0.0200259	0.199366	2.03295	0.00367727	0.0361858	0.290798	5.54281	5.70162	7.46025	5.44586	5.5095	6.99094		0.125	0.17934	1.31527	1.83358	0.7127	0.988072	9.81222	12.8185	90.1089	89.9552	90.4593	90.1933
BEPMAM	0.0127297	0.129371	1.36727	0.00240543	0.0241651	0.193891	0.0197609	0.199315	2.07491	0.00358316	0.0354696	0.288025	5.29207	5.35363	7.05172	5.51494	5.61933	7.20394		0.116641	0.179555	1.23789	1.8756	0.624455	1.00898	8.72929	13.5117	90.1603	90.0856	90.538	90.394
BEPNIV	0.0146619	0.147755	1.25898	0.00176135	0.0170212	0.123568	0.0195718	0.198455	2.02152	0.00349878	0.0348752	0.282605	8.32426	8.68066	10.1886	5.59391	5.69044	7.15317		0.133094	0.178883	1.11123	1.82307	1.15534	1.01792	11.3219	13.0407	90.0769	90.1379	88.2639	90.1829
BEPNOB	0.0118088	0.120789	1.28017	0.00236186	0.0236138	0.192271	0.0175361	0.178268	1.83747	0.00353242	0.0346759	0.28831	4.9998	5.11517	6.65816	4.96433	5.14098	6.37324		0.10898	0.160732	1.15938	1.6592	0.55745	0.826319	7.71935	10.5745	90.2236	90.1631	90.5646	90.2982
BEPPIX	0.0260948	0.251972	1.79577	0.00161896	0.0155044	0.0870696	0.029273	0.297429	3.33412	0.00310192	0.0309005	0.199683	16.1182	16.2516	20.6246	9.43706	9.62537	16.6971		0.225877	0.268156	1.5438	3.03669	3.67088	2.5811	31.8402	50.7038	89.6438	90.158	85.9686	91.0792
BEPPOD	0.0222802	0.224437	2.29871	0.00215197	0.0211181	0.135039	0.0275395	0.28117	3.10129	0.00324048	0.0319544	0.221113	10.3534	10.6277	17.0226	8.49858	8.79911	14.0258		0.202157	0.253631	2.07427	2.82012	2.14846	2.23172	35.3093	39.5546	90.0729	90.2054	90.2364	90.9338
BIFKEI	1.47532	2.78435	3.45752	0.00142737	0.00554494	0.0184837	0.308692	2.75118	7.21464	0.00443538	0.030479	0.0778576	1033.59	502.142	187.058	69.5976	90.2648	92.6645		1.30903	2.44249	0.67317	4.46346	657.317	220.47	125.922	413.604	47.0138	88.7797	19.4698	61.8667
CIJVOH	0.0158443	0.155223	1.37877	0.00120214	0.0117597	0.0866928	0.021278	0.214579	2.51828	0.0026984	0.0264617	0.195496	13.1801	13.1995	15.9041	7.8854	8.10904	12.8815		0.139378	0.193301	1.22354	2.3037	1.83973	1.56749	19.4593	29.6752	89.7926	90.0838	88.7419	91.4792
CIJVOH01	0.0191812	0.184865	1.61988	0.00132642	0.0128417	0.0889271	0.0217025	0.216499	2.57661	0.0028164	0.0273889	0.203642	14.4609	14.3957	18.2158	7.70578	7.90464	12.6527		0.165684	0.194797	1.43502	2.36012	2.38513	1.5398	26.14	29.8618	89.6242	89.9757	88.5877	91.5975
CIVTEH	0.129934	1.12743	3.74303	0.00248935	0.0192689	0.0568587	0.3906	2.77816	5.35546	0.00330362	0.0199125	0.0569363	52.1958	58.5107	65.8303	118.234	139.519	94.0605		0.997501	2.38756	2.61559	2.5773	58.3645	333.109	172.185	242.422	88.4753	85.9403	69.879	48.1247
FIFNUE	0.203345	1.765	5.56247	0.00215589	0.015048	0.0221524	0.337315	3.08445	7.81398	0.00361051	0.0251367	0.055247	94.3207	117.292	251.1	93.426	122.707	141.437		1.56166	2.74714	3.79746	4.72953	183.169	337.093	953.543	668.932	88.4791	89.064	68.2694	60.5265
FIFNUE01	0.190714	1.68521	5.48148	0.00214288	0.0151807	0.0242857	0.305117	2.88325	7.73589	0.00355861	0.0255221	0.0570182	88.9988	111.01	225.708	85.7405	112.971	135.674		1.4945	2.57813	3.79627	4.85264	165.904	291.253	856.846	658.378	88.6831	89.4176	69.2562	62.7289
HEKTAU	0.460507	2.28873	3.93709	0.00280928	0.0132047	0.0390067	0.40379	3.00512	6.44311	0.004337	0.0252334	0.0605174	163.923	173.328	100.934	93.1035	119.093	106.467		1.82823	2.60133	1.64836	3.43799	316.882	309.799	166.375	366.033	79.8794	86.5633	41.8674	53.3592
IDAGEA	0.0336669	0.25818	1.03075	0.000691476	0.00605598	0.0356683	0.0595889	0.514634	1.03075	0.00270124	0.0241179	0.0356683	48.6885	42.6322	28.8983	22.0599	21.3382	28.8983		0.224513	0.455045	0.772574	0.51612	9.57149	9.70986	22.3261	14.915	86.9599	88.4211	74.9523	50.0721
IKOSOQ	0.395784	1.53885	2.9474	0.00211671	0.0122684	0.040254	0.316254	1.53885	4.64473	0.003444	0.0122684	0.0720103	186.981	125.432	73.2201	91.8275	125.432	64.5008		1.14307	1.2226	1.40855	3.10588	143.377	153.353	103.134	200.332	74.2805	79.4487	47.7897	66.8689
KIPZEQ	0.31323	1.67054	2.94565	0.0021846	0.0101807	0.0221133	0.307712	2.17899	2.94565	0.00284311	0.0150467	0.0221133	143.381	164.089	133.207	108.231	144.815	133.207		1.35731	1.87128	1.27511	0.766659	222.719	270.99	169.854	102.124	81.2498	85.8782	43.288	26.0268
LIQCUK	0.0626821	0.567595	2.62797	0.00193117	0.0171207	0.0587867	0.499826	2.35327	5.21017	0.00302542	0.02005	0.0695032	32.4581	33.1525	44.7035	165.209	117.37	74.9631		0.504913	1.85345	2.06038	2.8569	16.7391	217.539	92.1062	214.162	88.9565	78.7604	78.4018	54.8332
MOXNUJ	0.24069	2.19284	6.08742	0.002385	0.0167769	0.0346087	0.0897417	0.873086	8.58288	0.0053267	0.0505487	0.268967	100.918	130.706	175.892	16.8475	17.2722	31.9105		1.95215	0.783344	3.89458	7.7098	255.158	13.5301	685.027	246.024	89.0238	89.7213	63.9775	89.8276
SENWAL	0.0201183	0.205533	2.14717	0.00442059	0.0434132	0.373097	0.0126652	0.128876	1.33862	0.0055646	0.0555882	0.51475	4.55104	4.73433	5.75498	2.27603	2.3184	2.60052		0.185414	0.116211	1.94163	1.20974	0.877814	0.269423	11.1741	3.14595	90.2116	90.1726	90.4277	90.3725
TEDGUG	0.0185067	0.179142	1.88372	0.00442895	0.0429708	0.385636	0.0220415	0.213016	2.2379	0.00664627	0.0646208	0.595176	4.17858	4.16891	4.88472	3.31637	3.29641	3.76005		0.160635	0.190975	1.70458	2.02488	0.669674	0.629531	8.32638	7.61365	89.6692	89.6527	90.49	90.4814
UXUPEJ	0.540936	1.94149	4.48469	0.00239178	0.0178164	0.048299	0.0794379	0.813585	8.24063	0.00676641	0.0654566	0.353878	226.164	108.972	92.8525	11.74	12.4294	23.2866		1.40056	0.734147	2.54319	7.42705	152.622	9.125	236.142	172.951	72.1382	90.2361	56.7084	90.1272
UXUPIN	0.501059	2.04369	4.43536	0.00247315	0.0177402	0.0502437	0.0779204	0.802183	8.39096	0.0068961	0.0674118	0.365467	202.6	115.201	88.277	11.2992	11.8997	22.9596		1.54263	0.724263	2.39167	7.58878	177.714	8.61854	211.129	174.235	75.4827	90.2865	53.9227	90.4399
VEHRIL	0.73678	1.00357	1.57916	0.00014341	0.00111189	0.00562658	0.822189	4.07112	8.89261	0.00307301	0.0250861	0.120854	5137.56	902.585	280.66	267.552	162.286	73.5812		0.266792	3.24893	0.575584	4.82149	240.803	527.255	161.544	354.771	26.5843	79.8043	36.4488	54.2191
VEHXEN	0.0285677	0.260054	2.28877	0.00203287	0.0195187	0.124296	0.00753156	0.0751926	0.796644	0.00267175	0.0268323	0.247691	14.0529	13.3233	18.414	2.81896	2.80231	3.21628		0.231486	0.067661	2.02872	0.721451	3.08417	0.189607	37.3567	2.32039	89.0147	89.9836	88.6378	90.5613
VEXYON	0.00580378	0.0592586	0.596622	0.00281799	0.0286251	0.263061	0.0391236	0.386097	2.57813	0.0046955	0.0453556	0.352038	2.05955	2.07016	2.268	8.33215	8.51267	7.32346		0.0534548	0.346973	0.537363	2.19204	0.11066	2.95367	1.21874	16.0533	90.206	89.8669	90.0676	85.0242
XEDPON	0.223643	1.26325	2.76237	0.00208969	0.0121902	0.0351742	0.137823	1.29159	6.59443	0.00442098	0.0369511	0.114471	107.022	103.628	78.534	31.1746	34.954	57.6077		1.03961	1.15377	1.49912	5.30284	107.733	40.3288	117.732	305.484	82.2962	89.3292	54.2694	80.4139
XINWUO	0.0850804	0.574779	1.58991	0.000741267	0.0057115	0.0250426	0.02304	0.23194	2.38312	0.0031896	0.0313425	0.23197	114.777	100.635	63.4883	7.22347	7.40019	10.2734		0.489699	0.2089	1.01513	2.15118	49.281	1.5459	64.4489	22.0999	85.1977	90.0664	63.8483	90.2674
	With Charge Balancing Ions (CO2 uptake, mol/kg) Mixture (CO2/N2)			With Charge Balancing Ions (N2 uptake, mol/kg) Mixture (CO2/N2)			Without Charge Balancing Ions (CO2 uptake, mol/kg) Mixture (CO2/N2)			Without Charge Balancing Ions (N2 uptake, mol/kg) Mixture (CO2/N2)			With Charge Balancing Ions (CO2/N2 Selectivities)			Without Charge Balancing Ions (CO2/N2 Selectivities)				Working Capacity (CO2, mol/kg) @ VSA		Working Capacity (CO2, mol/kg) @ PSA		APS (CO2, mol/kg) @ VSA		APS (CO2, mol/kg) @ PSA		Regenerability (CO2, %) @ VSA		Regenerability (CO2, %) @ PSA
MOF	@0.1 bar	@1 bar	@10 bar	@0.1 bar	@1 bar	@10 bar	@0.1 bar	@1 bar	@10 bar	@0.1 bar	@1 bar	@10 bar	@0.1 bar	@1 bar	@10 bar	@0.1 bar	@1 bar	@10 bar		With	Without	With	Without	With	Without	With	Without	With	Without	With	Without
BEPLUF	0.0136924	0.13866	1.30856	0.0121068	0.119374	0.888243	0.0198066	0.199225	1.83618	0.0180592	0.17693	1.33377	1.13097	1.16156	1.4732	1.09676	1.12601	1.37668		0.124967	0.179418	1.1699	1.63695	0.145157	0.202026	1.7235	2.25356	90.1252	90.0582	89.4036	89.15
BEPMAM	0.0126851	0.12859	1.23676	0.0114045	0.1125	0.839886	0.0197382	0.197644	1.852	0.0185742	0.181653	1.36085	1.11229	1.14302	1.47253	1.06267	1.08803	1.36091		0.115905	0.177905	1.10817	1.65436	0.132482	0.193566	1.63182	2.25144	90.1352	90.0132	89.6027	89.3281
BEPNIV	0.0147238	0.144945	1.08372	0.00979089	0.0937187	0.58056	0.019738	0.197693	1.80068	0.0185535	0.181545	1.34499	1.50383	1.5466	1.86669	1.06384	1.08895	1.3388		0.130221	0.177955	0.938779	1.60299	0.2014	0.193784	1.75241	2.14609	89.8418	90.0158	86.6253	89.0212
BEPNOB	0.0118112	0.119964	1.16142	0.0110593	0.108666	0.825504	0.0174583	0.176773	1.67272	0.0173998	0.170304	1.31406	1.06799	1.10397	1.40692	1.00336	1.03798	1.27294		0.108153	0.159314	1.04145	1.49595	0.119398	0.165366	1.46524	1.90425	90.1544	90.1239	89.6709	89.432
BEPPIX	0.0257954	0.245787	1.51949	0.0119937	0.110505	0.51156	0.0291278	0.295099	2.88853	0.015992	0.157326	1.03173	2.15075	2.22422	2.97031	1.8214	1.87572	2.79969		0.219992	0.265971	1.2737	2.59343	0.489311	0.498886	3.78329	7.26082	89.505	90.1295	83.8244	89.7838
BEPPOD	0.0222894	0.223333	1.96528	0.0128515	0.124881	0.768346	0.0277489	0.278845	2.70826	0.0164307	0.160397	1.10074	1.73438	1.78837	2.55781	1.68884	1.73847	2.4604		0.201043	0.251096	1.74195	2.42941	0.359539	0.436523	4.45557	5.97734	90.0196	90.0487	88.6361	89.7039
BIFKEI	1.47883	2.73621	3.36485	0.0290804	0.0728783	0.118874	0.308172	2.59764	6.6579	0.0541981	0.358898	0.605695	50.8531	37.545	28.3061	5.68602	7.23782	10.9922		1.25738	2.28947	0.628633	4.06026	47.2084	16.5708	17.7942	44.631	45.9534	88.1365	18.6824	60.9841
CIJVOH	0.0159223	0.154318	1.3336	0.00284068	0.0280784	0.229871	0.0212059	0.20919	2.27606	0.0128191	0.122611	0.919892	5.6051	5.49595	5.80153	1.65425	1.70613	2.47427		0.138395	0.187984	1.17929	2.06687	0.760613	0.320724	6.84166	5.11398	89.6821	89.8628	88.4285	90.8091
CIJVOH01	0.01928	0.18569	1.55175	0.00388062	0.0372104	0.275936	0.021519	0.2115	2.32739	0.0134234	0.128763	0.976482	4.96827	4.99027	5.6236	1.6031	1.64255	2.38344		0.16641	0.189981	1.36606	2.11589	0.83043	0.312054	7.68218	5.04311	89.6171	89.8256	88.0335	90.9125
CIVTEH	0.128657	1.06129	3.32572	0.0325652	0.228865	0.509043	0.391042	2.6668	4.95527	0.0432875	0.264636	0.511645	3.95076	4.63716	6.53328	9.0336	10.0772	9.68498		0.932628	2.27575	2.26443	2.28848	4.32475	22.9332	14.7942	22.1638	87.8772	85.3366	68.0885	46.1827
FIFNUE	0.200764	1.70774	5.3483	0.0236947	0.152683	0.190367	0.332535	3.0286	7.46503	0.0306095	0.230497	0.429412	8.47293	11.1849	28.0946	10.8638	13.1395	17.3843		1.50697	2.69607	3.64056	4.43642	16.8553	35.4249	102.28	77.1242	88.2439	89.0202	68.0695	59.4294
FIFNUE01	0.193551	1.65518	5.25623	0.0225658	0.148225	0.198274	0.305272	2.80815	7.37613	0.0292503	0.22571	0.435948	8.57719	11.1667	26.5099	10.4365	12.4414	16.9197		1.46163	2.50288	3.60104	4.56798	16.3216	31.1393	95.4633	77.2891	88.3064	89.129	68.51	61.9292
HEKTAU	0.450906	2.13872	3.66167	0.057454	0.213289	0.323027	0.400456	2.78845	5.89017	0.0729585	0.392768	0.623565	7.84813	10.0273	11.3355	5.48881	7.0995	9.44596		1.68781	2.388	1.52295	3.10171	16.9243	16.9536	17.2633	29.2987	78.917	85.6388	41.5917	52.6592
IDAGEA	0.0331278	0.255024	0.969078	0.00365914	0.0301101	0.133439	0.0590726	0.494084	2.44309	0.0261257	0.217573	0.851151	9.05344	8.4697	7.26233	2.26109	2.27088	2.87034		0.221896	0.435011	0.714054	1.94901	1.87939	0.98786	5.1857	5.59432	87.0099	88.044	73.6839	79.7763
IKOSOQ	0.386926	1.43449	2.64475	0.0425317	0.198834	0.365699	0.308803	1.86094	4.14653	0.055584	0.310685	0.577993	9.09735	7.21452	7.23205	5.55561	5.98981	7.17401		1.04756	1.55214	1.21026	2.28558	7.55767	9.29703	8.75269	16.3968	73.0269	83.4061	45.7609	55.1204
KIPZEQ	0.302743	1.52518	2.65668	0.0539024	0.21732	0.303954	0.3035	2.01624	3.82772	0.0554756	0.275564	0.3967	5.6165	7.01815	8.74039	5.47087	7.31676	9.64891		1.22244	1.71274	1.13149	1.81149	8.57928	12.5317	9.88969	17.4789	80.1504	84.9472	42.5905	47.3254
LIQCUK	0.0625527	0.532402	2.1116	0.0261855	0.214272	0.627307	0.49734	2.28906	4.71637	0.036541	0.215488	0.656466	2.38883	2.4847	3.36613	13.6105	10.6227	7.18448		0.469849	1.79172	1.57919	2.42731	1.16743	19.0328	5.31577	17.439	88.2508	78.2731	74.7868	51.4657
MOXNUJ	0.241523	2.18055	5.91589	0.0145263	0.110325	0.207318	0.0895898	0.874227	7.72355	0.0261365	0.247881	1.40643	16.6265	19.7649	28.5353	3.42777	3.5268	5.49159		1.93903	0.784637	3.73534	6.84932	38.3246	2.76726	106.589	37.6136	88.9238	89.7521	63.1408	88.681
SENWAL	0.0201015	0.205064	2.04638	0.0168447	0.167096	1.39218	0.0126282	0.128102	1.32808	0.0169888	0.171266	1.55981	1.19334	1.22722	1.46991	0.743325	0.747971	0.851435		0.184962	0.115474	1.84132	1.19997	0.226989	0.0863709	2.70658	1.0217	90.1974	90.1421	89.9792	90.3543
TEDGUG	0.0183398	0.17767	1.77154	0.0184453	0.177641	1.52778	0.0219378	0.210902	2.11405	0.0249992	0.239419	2.11009	0.994281	1.00016	1.15955	0.877543	0.880893	1.00188		0.159331	0.188965	1.59387	1.90315	0.159357	0.166458	1.84817	1.90673	89.6776	89.5981	89.9708	90.0238
UXUPEJ	0.546984	1.89567	3.99496	0.0332794	0.235276	0.526334	0.0794254	0.80249	6.76571	0.0484805	0.462316	2.40964	16.4362	8.05722	7.59016	1.6383	1.7358	2.80777		1.34868	0.723064	2.09929	5.96322	10.8666	1.2551	15.934	16.7433	71.1455	90.1026	52.5485	88.1389
UXUPIN	0.507822	1.98573	3.97397	0.0332896	0.231395	0.514544	0.0778701	0.790132	6.89417	0.048328	0.45954	2.45434	15.2547	8.58153	7.72329	1.61128	1.7194	2.80897		1.4779	0.712262	1.98825	6.10403	12.6827	1.22466	15.3558	17.1461	74.4264	90.1447	50.0317	88.5391
VEHRIL	0.733636	1.00779	1.59436	0.000784092	0.00541674	0.0192601	0.821068	4.06856	8.52786	0.0159156	0.135726	0.623156	935.65	186.051	82.7802	51.5888	29.9764	13.685		0.274151	3.24749	0.586569	4.4593	51.0059	97.3479	48.5563	61.0254	27.2032	79.8192	36.7904	52.291
VEHXEN	0.028175	0.254187	1.98931	0.0123097	0.11216	0.65069	0.00753953	0.0755606	0.80321	0.00778963	0.0777689	0.725178	2.28885	2.26629	3.05723	0.967893	0.971605	1.1076		0.226012	0.0680211	1.73512	0.72765	0.512209	0.0660896	5.30468	0.805948	88.9156	90.0219	87.2224	90.5927
VEXYON	0.00579444	0.0589728	0.597274	0.00790503	0.0795091	0.719812	0.038847	0.370264	2.23864	0.0244562	0.224675	1.32347	0.733007	0.741712	0.829763	1.58843	1.648	1.69149		0.0531784	0.331417	0.538301	1.86838	0.039443	0.546176	0.446662	3.16033	90.1744	89.5083	90.1263	83.4603
XEDPON	0.217955	1.16415	2.52683	0.039577	0.176445	0.289206	0.136736	1.22886	5.68143	0.0488072	0.38996	1.09312	5.50711	6.5978	8.73714	2.80156	3.15124	5.19745		0.946192	1.09212	1.36269	4.45258	6.24278	3.44154	11.906	23.1421	81.2777	88.8729	53.9286	78.3706
XINWUO	0.0858128	0.570589	1.58466	0.00123061	0.00904537	0.0348109	0.0229499	0.22969	2.07723	0.0171952	0.166253	1.11703	69.7319	63.0808	45.5218	1.33467	1.38157	1.85959		0.484776	0.20674	1.01407	1.84754	30.5801	0.285625	46.1622	3.43566	84.9607	90.0083	63.9929	88.9425

## Sheet: Figure S1
	Figure S1. Coefficient of determination, R2, calculated for single-component CO2 uptakes of MOFs with and without solvents.

## Sheet: Figure S2
		Figure S2. CO2 adsorption surfaces (dark grey shapes highlighted with black circles) of (a) PACZUQ and (b) ECOLEP.

## Sheet: Figure S3
	Figure S3. Comparisons of single-component CO2 uptakes of MOFs with and without coordinated solvent molecules for separation of (a) CO2/CH4:50/50, (b) CO2/H2:15/85, and (c) CO2/N2:15/85 mixtures at 0.1, 1 and 10 bar
